1

2

3

4

5 **Outcomes of early NIH-funded investigators: Experience of the**  
6 **National Institute of Allergy and Infectious Diseases**

7

8

9 Patricia A. Haggerty<sup>1\*</sup>, Matthew J. Fenton<sup>1</sup>

10

11

12 <sup>1</sup>Office of the Director, Division of Extramural Activities, National Institute of Allergy and Infectious  
13 Diseases, Bethesda, Maryland, United States of America

14

15 \*Corresponding author

16 Email: [haggertp@nih.gov](mailto:haggertp@nih.gov) (PAH)

17

## 19 **Abstract**

20

21 Survival of junior scientists in academic biomedical research is difficult in today's highly competitive  
22 funding climate. National Institute of Health (NIH) data on first-time R01 grantees indicate the rate at  
23 which early investigators drop out from a NIH-supported research career is most rapid 4 to 5 years from  
24 the first R01 award. The factors associated with a high risk of dropping out, and whether these factors  
25 impact all junior investigators equally, are unclear. We identified a cohort of 1,496 investigators who  
26 received their first R01-equivalent (R01-e) awards from the National Institute of Allergy and Infectious  
27 Diseases between 2003 and 2010, and studied all their subsequent NIH grant applications through 2016.  
28 Ultimately, 57% of the cohort were successful in obtaining new R01-e funding, despite highly  
29 competitive conditions. Among those investigators who failed to compete successfully for new funding  
30 (43%), the average time to dropping out was 5 years. Investigators who successfully obtained new  
31 grants showed remarkable within-person consistency across multiple grant submission behaviors,  
32 including submitting more applications per year, more renewal applications, and more applications to  
33 multiple NIH Institutes. Funded investigators appeared to have two advantages over their unfunded  
34 peers at the outset: they had better scores on their first R01-e grants and they demonstrated an early  
35 ability to write applications that would be scored, not triaged. The cohort rapidly segregated into two  
36 very different groups on the basis of PI consistency in the quality and frequency of applications  
37 submitted after their first R01-e award. Lastly, we identified a number of specific demographic factors,  
38 institutional characteristics, and grant submission behaviors that were associated with successful  
39 outcomes, and assessed their predictive value and relative importance for the likelihood of obtaining  
40 additional NIH funding.

41

## 42 Introduction

43

44 Today, young scientists launching careers in biomedical research face a long, demanding path. The path  
45 includes years of post-graduate training, chronically low salaries, intense competition, historically low  
46 success rates for obtaining NIH funding, and a dearth of academic employment opportunities for  
47 independent scientists, given that the growth in number of advanced-degree graduates has outstripped  
48 the pace of research faculty positions opening [1-5]. Alberts et al. [6] attributed current systemic flaws  
49 in biomedical research in the United States (US) to a long-standing assumption that support and funding  
50 for this enterprise would expand almost indefinitely, a notion reinforced by the doubling of the NIH  
51 budget from 1999 to 2003. By the time the budget-doubling period ended, institutional expansion and  
52 growth of the scientific workforce resulted in a demand for research funds that far exceeded the  
53 availability of funds. Teitelbaum [7] described this disparity between supply and demand as the  
54 “structural disequilibrium” of research funding. This disparity was worsened by the US economic  
55 recession that began in 2008 and by the sequestration of the federal budget in 2013. As a result, NIH  
56 success rates declined to historic lows between 2003 and 2013 [8, 9], with little subsequent  
57 improvement.

58

59 Many in the field are concerned that new scientists will be discouraged from pursuing academic careers  
60 in the current climate. Stiff competition for research funds, low paylines, and poor job prospects are  
61 likely to drive talented investigators out of the biomedical workforce [4, 8, 10]. Even when new  
62 scientists secure an academic faculty position, their path to independence is still unsure, as evidenced  
63 by the continued increase in the average age of a NIH-funded investigator when obtaining their first  
64 R01 [11]). Moreover, NIH data (using cohorts from 1989, 1997, and 2003) show the rate of dropout (i.e.

65 when an investigator fails to obtain a new or renewal R01-e grant award after the first one and stops  
66 applying) is greatest between 4 and 5 years from the first award [12]). Similar patterns were found  
67 using data from a cohort of NIAID first-time investigators from 1986 to 2003 (Fig 1). By 5 years, 68% of  
68 the NIAID cohort remained (32% dropped out), while 57% of the other NIH cohort remained (39%  
69 dropped out). The steep dropout between 4 and 5 years (red line in Fig 1) coincides with the duration of  
70 the first R01-e awards.

71

72 **Fig 1. Length of Time Awardees Remain in NIH Applicant Pool After After the First R01-e Award.** A  
73 Kaplan–Meier approach was used to measure the length of time investigators in each cohort remained  
74 in the NIH R01-e applicant pool after receiving their first R01-e awards. Y-axis: percent of investigators  
75 in each cohort who received an additional RPG award and remain in applicant pool. Investigators who  
76 do not remain in pool are considered to have ‘dropped out’. X-axis: years since receiving first R01-e  
77 award. Blue line: NIAID awardees. Orange line: other-NIH awardees. Solid red line: dropout slope  
78 between 4 and 5 years. Half of the NIAID cohort dropped out by 15 years after the first R01-e award  
79 (i.e. half-life 15 years); half of the other-NIH cohort dropped out by 10 years, or 50% sooner than the  
80 NIAID cohort.

81

82

83 What these prior reports did not address is whether there are specific risk factors leading to a high rate  
84 of dropout around the time that an investigator’s first R01 grant ends, and if so, if these factors impact  
85 all junior faculty equally. Furthermore, these prior studies did not discern whether there are  
86 characteristics and grant submission practices associated with investigators who are ultimately  
87 successful in obtaining future NIH funding, and those who are not. Armed with such knowledge,  
88 interventions might be developed to reduce the rate of dropout in this important pool of new scientists.

89

90 In order to better understand how first-time NIAID awardees compete for subsequent R01 awards, what  
91 their funding outcomes were, and when they drop out, we identified a cohort of principal investigators  
92 (PI) whose first R01-e awards were made by NIAID between between 2003 and 2010. We studied the  
93 cohort's grant submissions and funding outcomes from the time of their first R01-e award through 2016.  
94 Our objectives were to learn: 1) what proportion of the cohort successfully competed for new or  
95 renewal NIH funding subsequent to their first award; 2) what were the grant funding outcomes and  
96 application submission behaviors of the PIs as they continued to apply for future funding; and 3) if there  
97 were demographic, institutional or other individual characteristics that differentiated successful and  
98 unsuccessful individuals.

99

## 100 **Methods**

101

### 102 **Data Sources**

103

104 All data used for this study came from the NIH database of information on extramural application and  
105 award records, known as Information for Management, Planning, Analysis, and Coordination II (IMPAC  
106 II). The NIH Query/View/Report (QVR) System was used to search the IMPAC II database and extract the  
107 data.

108

109 Personal demographic data on the cohort PIs, confidentially maintained by the NIH under the Privacy  
110 Act Systems of Record Notice 09-25-0036 [13] were provided to the authors by the NIH Office of  
111 Extramural Research, with permission. Regarding use of personally identifiable PI data, we followed the

112 NIH policy stipulating: “All analyses conducted on date of birth, citizenship, gender, race, [and] ethnicity  
113 ... data will report aggregate statistical findings only and will not identify individuals [14].

114

## 115 **First-time R01-Equivalent Awards**

116

117 In addition to the R01, we include the following types of major research grants as R01-e: program  
118 projects and centers, cooperative agreements, other multi-project grants, and sub-projects of multi-  
119 project grants [15]. These grants are generally equivalent to the R01 in terms of cost, duration, effort,  
120 independence of the PI or Project Leader, and level of expertise required. NIH has historically  
121 considered a narrower range of grant types (referred to as activity codes) under the R01-e umbrella, but  
122 in programmatic contexts the activity codes considered to be R01-e have changed over time [16-17].  
123 Unless otherwise specified, the term R01-e in this paper includes the broad range of grants mentioned  
124 above.

125

126 A small proportion of investigators, about 10%, received two first-time R01-e awards in the same fiscal  
127 year (FY). In these cases, we selected one of the two awards as their “first” award. To avoid confusion,  
128 we called the identified first award the “index award”, the application submitted for it the “index  
129 application”, and the FY the award was made in the “index fiscal year” (IFY).

130

## 131 **Study Time Frame**

132

133 Our goal was to identify all PIs who received their index awards from NIAID between FYs 2003 and 2010,  
134 and to follow their subsequent grant submissions and outcomes. We chose 2003 as the cohort start

135 year, because this was the end of the NIH budget doubling period [18]. We stopped the cohort at 2010  
136 to allow sufficient time for first-time R01 awardees from this year to complete at least one 4- or 5-year  
137 project and apply for another.

138

139 The overall time frame of the study is from FYs 2003 through 2016. More precisely, for each  
140 investigator, the time frame is from the date of their index award until their final R01-e application, or  
141 through FY 2016, whichever came first. Thus, investigators who received their index awards in 2003, the  
142 first cohort year, were followed up to 13 years, investigators who received their index awards in 2004  
143 were followed up to 12 years, and so on. Investigators who received index awards in the latest cohort  
144 year, 2010, were followed up to 6 years.

145

## 146 **Identification of Cohort PIs**

147

148 From IMPAC II we extracted all competing R01-e awards made by NIAID between 1970 and 2010,  
149 excluding awards paid with funds appropriated under the American Recovery and Reinvestment Act of  
150 2009. From this data set of 25,125 awards, we selected all awards made to PIs who were formerly NIH  
151 “New Investigators” prior to receiving that award [19]. Awards made to established investigators were  
152 omitted from the data set. More details of the steps we used to identify these awards and awardees  
153 are included S1 Appendix.

154

155 From the list of first-time awardees, 3 groups were distinguished: 1) those who received their first R01-  
156 e awards from NIAID; 2) those who received an R01-e award *other than R01* from NIAID and had not  
157 received an earlier R01 award from another NIH Institute (IC); and 3) those who received R01-e awards  
158 *other than R01* from NIAID *and* an earlier R01 award from another IC. We excluded the third group,

159 because we wanted to focus on investigators who received their first awards from NIAID. Among the PIs  
160 who received R01-e awards *other than R01* from NIAID and no earlier R01 award (the second group), a  
161 very small number were subproject directors on a multi-project grant and these PI were kept in the  
162 cohort.

163

164 In total, we identified 1,496 investigators who received their first R01-e awards from NIAID between FYs  
165 2003 and 2010. To distinguish these investigators from other established investigators, we called them  
166 “Early NIH-funded Investigators” (ENI).

167

## 168 **Application Data**

169

170 In order to study the grant application submission behavior of the cohort, we took the unique PI  
171 identification number – the PI profile ID – of the 1,496 ENI and searched the IMPAC II database for all  
172 R01-e grant applications submitted by the cohort ENI to any NIH IC between 2003 and 2016.

173

174 In this study, we call every version of a grant application, whether it is the original version or one that  
175 was revised and resubmitted after an earlier unfunded version, an “application”. A new (NIH Type-1)  
176 application seeks funding for a new research project with different specific aims than any other project  
177 the PI has sought funding for. A renewal (NIH Type-2 or Type-9) application seeks an additional 4-5  
178 years of funding for a research project that has already been funded by NIH for at least 4-5 years.

179 Competitive supplement applications and applications withdrawn before peer review were not included.

180

181 The search extracted 12,964 applications, along with various project identifiers: PI identifiers, applicant  
182 institution information, the NIH IC assigned to the application, review information, and outcomes



183 (funded or not funded). Eighteen percent (n = 2,365) of these applications were subprojects of multi-  
184 project grants.

185

## 186 **Application Outcomes**

187

188 Examining the relationship between application outcomes and ENI funding success was an important  
189 part of this study. Here, we briefly describe how research project grant (RPG) application outcomes are  
190 determined at the NIH, and then discuss how we used cohort application outcome data.

191

192 Typically, during the NIH peer review process, about half of all RPG applications assigned to NIH study  
193 sections (committees) are “triaged”. That is, they are judged by the study section to be in the lower  
194 half, qualitatively, of all the applications assigned to the committee, and are designated as  
195 “noncompetitive”. Noncompetitive applications do not receive full discussion at the study section  
196 meeting, and their scores are not reported.

197

198 Applications that are not triaged receive a full discussion at the study section meeting and an overall  
199 numerical impact (or “priority”) score. Investigator-initiated R01 applications (i.e. most R01s) also  
200 receive a percentile score. The percentile score is based on a ranking of all the impact scores assigned  
201 by the committee in the previous 12 months. An application ranked in the 5<sup>th</sup> percentile is considered  
202 more meritorious than 95% of the applications reviewed by that committee. Percentile scoring is  
203 intended to standardize impact scores across study sections that may have different scoring behaviors.  
204 R01 applications responding to a request for applications (RFA) and other R01-e applications are  
205 generally not percentiled.

206

207 NIAID establishes award thresholds from percentile ranks – called “paylines” – up to which nearly all R01  
208 applications will be funded. For applications that are not percentiled, paylines are typically expressed  
209 as a priority score [20].

210

211 Therefore, the ENI applications included in this study had 3 possible outcomes: 1) triaged, unscored, not  
212 considered for funding; 2) scored, above the payline, ususally not funded; or 3) scored, within the  
213 payline, and funded. The majority of RPG applications that are not triaged are in the second category,  
214 i.e. initially judged to be competitive, but usually not funded. Many of these are subsequently revised  
215 and resubmitted for another round of peer review and funding consideration. Some applications that  
216 score above the payline may be funded under IC-specific funding rules.

217

218 Analysis of application outcomes was complicated by several factors: 1) in 2009, a new scoring system  
219 was introduced as part of the NIH Enhancing Peer Review initiative that changed scoring from a 0 to 500  
220 point scale, to a 1 to 9 point scale [21]; 2) among the non-triaged applications, 20% had numerical  
221 priority scores but no percentile ranks; and 3) subproject applications (18% of all applications) had no  
222 triage identifiers, priority scores or percentile ranks.

223

224 For applications that were not triaged, the only valid metric for comparison purposes was the percentile  
225 rank. As noted, priority scores were subject to wide variation in study section behavior, so they could  
226 not be used. Therefore, for applications that had priority scores but no percentile ranks, we  
227 extrapolated percentiles in the following manner. For any given numerical priority score on a non-  
228 percentiled application, we took all percentiled applications with the same numerical score, calculated  
229 the average of their percentiles and assigned that percentile value to the non-percentiled application.

230 This approach worked for applications before and after the change in the peer review scoring system  
231 and allowed us to include more of the applications in the data set.

232

233 There was no practical way to attach percentile scores to subproject applications, so these were  
234 excluded from any analyses that required application percentile data.

235

## 236 **PI-level Metrics**

237

238 The primary outcome variable in this study is ENI success in obtaining additional new or renewal NIH  
239 R01-e funding after the IFY. ENI who obtained at least one additional award are called “funded” ENI,  
240 and those who did not obtain any additional awards are called “unfunded” ENI. For as long as an ENI  
241 continued to submit R01-e applications (or through FY 2016 at the latest), regardless of whether they  
242 were funded or unfunded, we followed their submission behaviors and application outcomes.

243

244 Because applications submitted by individual ENI reflect the application quality and submission behavior  
245 of that specific ENI, our analyses could not be based on comparisons between all applications from  
246 funded and unfunded ENI without potentially introducing bias. For example, multiple applications from  
247 the same ENI could artificially inflate or deflate summary metrics used to compare the two groups.

248 Therefore, we concentrated on identifying comparisons at the person- (or PI-) level. We did use the  
249 application data to derive several PI-level metrics which we collectively called the PI SCORECARD. The  
250 values of items in the PI SCORECARD were based on the applications submitted by the ENI while s/he  
251 was in the study and included: SCORE (the average application score of all the ENI’s non-triaged

252 applications); QUALITY (the proportion of all the ENI’s applications that were triaged, i.e. not scored at  
253 peer review, considered not competitive); FREQUENCY (the average number of applications submitted

254 by the PI per year); SPEED (the length of time between the index award and first subsequent grant  
255 submission); REACH (the proportion of the PI's applications submitted to a single NIH IC (versus to  
256 multiple ICs)); RENEW (the proportion of the PI's applications that were renewal applications); RESUB  
257 (the proportion of the PI's applications that were resubmissions, i.e. previously peer reviewed but not  
258 funded, formerly called amended applications); ACTIVE (the length of time the PI remained in the R01-e  
259 applicant pool); and INDEX (the PI's index award percentile score).

260

261 **Table 1. PI SCORECARD: Grant Submission Behaviors and Grant Quality Indices**

| <b>PI Factor</b> | <b>Definition</b>                                                   | <b>Meaning of Factor Value</b> |
|------------------|---------------------------------------------------------------------|--------------------------------|
| <b>SCORE</b>     | PI average application score (percentile)                           | Lower = stronger               |
| <b>QUALITY</b>   | % of PI's applications triaged                                      | Lower = stronger               |
| <b>INDEX</b>     | Index award score (percentile)                                      | Lower = stronger               |
| <b>FREQUENCY</b> | PI's average number of applications per year                        | Higher = more                  |
| <b>SPEED</b>     | Time (y) between index award and first subsequent R01-e application | Lower = faster                 |
| <b>REACH</b>     | % of PI's applications sent to single NIH IC                        | Lower = more sent to other ICs |
| <b>RENEW</b>     | % of PI's applications as renewals                                  | Higher = more                  |
| <b>RESUB</b>     | % of PI's applications as resubmissions                             | Higher = more                  |
| <b>ACTIVE</b>    | Number of years PI remained in R01-e NIH applicant pool             | Higher = longer                |

262

263

## 264 **Project Start Dates**

265

266 A critical application-associated data field in this study was the project start date. Project start date was  
267 essential for: 1) identifying ENI index awards; 2) chronologically ordering applications for each ENI; and  
268 3) calculating the time between the index award and the ENI's subsequent applications.

269

270 For many applications in our data set, project start dates were missing or inaccurate, due to a variety of  
271 reasons. (For more information about project start date, see S1 Appendix.) Therefore, we chose to use  
272 a different parameter altogether as a proxy for project start date. All but 57 applications had Council  
273 Dates (i.e. the meeting date of the National Advisory Allergy and Infectious Diseases Council). We took  
274 the NIAID average time from Council Date to notice-of-award date (4 months) and added this to the  
275 application Council Date to derive an estimated project start date. We applied this approach uniformly  
276 to all applications, except for the 57 without Council Dates. Fortunately, the latter had accurate project  
277 start dates, which we used.

278

## 279 **Statistical Methods**

280

281 For comparisons between funded and unfunded ENI according to independent categorical variables, we  
282 used Pearson's  $\chi^2$  test. For comparisons between the two groups according to independent continuous  
283 variables, we used the Welch Two Sample t-Test. The full cohort of ENI (n=1,496) was used in  
284 comparisons between funded and unfunded ENI according to the inherent independent variables, i.e.  
285 demographic, institutional, and PI background characteristics. In contrast, comparisons between the  
286 two groups according to PI SCORECARD items were limited to just the ENI who submitted additional

287 grant applications after the IFY (n = 1,322, or 88% of the cohort). Our rationale was that the strength of  
288 associations of these variables with funding outcome may have been influenced as a consequence of  
289 repeated grant writing.

290

291 To analyze the effects of independent (predictor) variables on the likelihood of ENI funding, we used  
292 univariate and multivariate logistic regression analyses. To identify the relative importance of each of  
293 the variables in predicting ENI funding success when all variables were included in a multivariate model,  
294 we used random forests (RF), a machine learning algorithm that evaluates the importance of variables by  
295 estimating the change (i.e. the prediction error) in a model quality score that occurs when any single  
296 variable is randomly permuted, while others are left unchanged [22]. Larger values of importance  
297 indicate stronger predictors, and values close to zero suggest the variable is not a good predictor. RF are  
298 popular because of their ability to deal with large numbers of covariates, non-linear associations,  
299 complex interactions and correlations between variables; RF have been used in many biomedical  
300 research fields [23-27]. In our RF variable importance (RFVI) analysis we converted all predictor  
301 variables into binomials, to avoid reported possible bias of RF when used with categorical variables with  
302 multiple levels, or correlated predictors [28, 29].

303

304 All statistical analyses were performed using R version 3.4.3, with packages plyr, dplyr, ggplot2, readxl,  
305 lme4, and randomForest (Breiman and Cutler, 2018) [30-36]. Microsoft Excel 2016 was used for early  
306 conditioning of raw data extracted from IMPAC II.

307

## 308 **Results**

309

## 310 Cohort Descriptive Characteristics

311

312 An average of 13% of the ENI came from each of the 8 cohort years (2003 – 2010) (Table 2). Slightly  
313 more than half (52%) of the cohort came from the first 4 years (2003 – 2006), and 2003 had the largest  
314 number of ENI compared to all the other years.

315

316 **Table 2. Number of ENI per Cohort Year and Percent of Total Cohort**

| Cohort Year* | # of ENI | % of Total Cohort |
|--------------|----------|-------------------|
| 2003         | 236      | 16%               |
| 2004         | 185      | 12%               |
| 2005         | 194      | 13%               |
| 2006         | 167      | 11%               |
| 2007         | 199      | 13%               |
| 2008         | 151      | 10%               |
| 2009         | 197      | 13%               |
| 2010         | 167      | 11%               |
| Total Cohort | 1496     | 100%              |

317 \*Cohort Year = FY in which ENI received index award and entered study cohort

318

## 319 ENI Demographic Characteristics

320

321 Demographic characteristics of the cohort are shown in Table 3. Just under three quarters (73%) of the  
322 ENI were male. Of 1,370 ENI with known date of birth, the median age at receipt of the index award  
323 was 41.2 y (mean 42.6 y). Of 1,301 ENI with known birth countries, 75% were born in the US, and 25%

324 in 66 other countries. The proportions of investigators by gender, birth country, and age at index award,  
325 are similar to overall NIH data [37, 38].

326

327 In terms of self-reported race and ethnicity, 64% of the ENI were white, 20% Asian, 5% Hispanic, 1.5%  
328 African American (AA), less than 1% more-than-one-race (MR), and less than 1% Native (American Indian  
329 or Alaskan Native). We combined the 22 AA and 9 MR ENI into a single group (AA/MR), representing  
330 2% of the cohort. Compared to the NIH overall, the NIAID cohort had slightly higher representations of  
331 AA and Hispanic investigators, and a lower representation of white investigators. Between 1999 and  
332 2012 the NIH had, on average, 1.2% Black, 3.5% Hispanic, and 79% White R01 awardees [39].

333

334 **Table 3. ENI Demographic Characteristics**

| <b>Gender</b>         | <b># ENI</b> | <b>% of Total Cohort</b> |
|-----------------------|--------------|--------------------------|
| Female                | 396          | 26%                      |
| Male                  | 1074         | 72%                      |
| M/W <sup>o</sup>      | 26           | 2%                       |
|                       |              |                          |
| <b>Birth Country</b>  | <b># ENI</b> | <b>% of Total Cohort</b> |
| Foreign               | 322          | 22%                      |
| US                    | 979          | 65%                      |
| M/W <sup>o</sup>      | 195          | 13%                      |
|                       |              |                          |
| <b>Race/Ethnicity</b> | <b># ENI</b> | <b>% of Total Cohort</b> |
| AA/MR*                | 29           | 2%                       |
| Hispanic              | 78           | 5%                       |
| Asian                 | 301          | 20%                      |



|                           |        |      |
|---------------------------|--------|------|
| White                     | 954    | 64%  |
| Native**                  | 2      | < 1% |
| M/W <sup>o</sup>          | 132    | 9%   |
| <b>Age at Index Award</b> |        |      |
| Mean                      | 42.6 y |      |
| Median                    | 41.2 y |      |

335 <sup>o</sup>Missing/Withheld; \*African-American, more-than-one-race; \*\*American Indian, Alaskan Native

336 Age at Index Award based on 1,370 ENI; data for 126 individuals (8% of cohort) were M/W<sup>o</sup>

337

### 338 ENI Background and Index Institution Characteristics

339

340 ENI terminal research or post-graduate clinical training degrees were categorized into 4 groups: MD,  
 341 MD/PhD, PhD (or equivalent), and Other (Table 4). Almost 70% of ENI had PhD or equivalent degrees,  
 342 30% had MD or MD/PhD degrees, and 1% had other degrees. Seventeen percent of ENI were prior  
 343 recipients of an NIH career development (i.e. “K”) award. All but 8% of ENI were employed at US  
 344 institutions when they received their index award, and most institutions were non-medical school  
 345 institutions of higher education (43%) or medical schools (29%). This distribution of ENI across these  
 346 institution types parallels the historic distribution of institution types according to allocation of NIH  
 347 grant funding [40].

348

349 **Table 4. ENI Background and Index Institution Characteristics**

350

| Degree Group | # ENI | % of Total Cohort |
|--------------|-------|-------------------|
|--------------|-------|-------------------|

351

|                                            |              |                          |
|--------------------------------------------|--------------|--------------------------|
| MD                                         | 289          | 19%                      |
| MD, PhD                                    | 172          | 11%                      |
| PhD (or equiv.)                            | 1041         | 68%                      |
| Other                                      | 20           | 1%                       |
| <b>Prior K Award</b>                       |              |                          |
|                                            | <b># ENI</b> | <b>% of Total Cohort</b> |
| No                                         | 1249         | 83%                      |
| Yes                                        | 247          | 17%                      |
| <b>Institution US or Foreign</b>           |              |                          |
|                                            | <b># ENI</b> | <b>% of Total Cohort</b> |
| Foreign                                    | 125          | 8%                       |
| US                                         | 1371         | 92%                      |
| <b>Institution Type</b>                    |              |                          |
|                                            | <b># ENI</b> | <b>% of Total Cohort</b> |
| Independent Hospital                       | 130          | 9%                       |
| Higher Education (non-medical school)      | 636          | 43%                      |
| Other Health, Health-rel., Community Srvc. | 36           | 2%                       |
| Independent Research                       | 156          | 10%                      |
| Medical School                             | 429          | 29%                      |
| Company                                    | 108          | 7%                       |
| Foreign                                    | 1            | < 1%                     |

352

353

354

In this study, the term “institution” refers to the institution where the PI was employed at the time of

355

receiving his/her index award. To characterize institutions further, we took the ENI from US, non-

356

commercial institutions, and divided them into 3 roughly equal groups – or “tertiles” – according to the

357

number of ENI employed at those institutions when they received their first R01-e grant (Table 5).

358 There were 1,272 ENI, from 269 institutions, in this analysis; 181 ENI from 103 foreign institutions and  
359 78 US companies were excluded. The first tertile included 406 ENI from institutions with 14 to 37 ENI  
360 per institution, or “high-ENI density” institutions. The second tertile included 454 ENI from institutions  
361 with 6 to 13 ENI per institution, or “medium-ENI density” institutions. The third tertile included 412 ENI  
362 from “low-ENI density” institutions, or institutions with 1 to 5 ENI per institution. Interestingly, just 75  
363 of the 269 institutions (28%) were in the top two tertiles, while 194 institutions (72%) were in the third  
364 tertile. The high- and medium-ENI density institutions historically have been, and remain, among the  
365 NIH top-funded institutions [41].

366

367 **Table 5. Institution ENI Density**

| ENI Density Tertile <sup>+</sup> | # Institutions | # ENI | % of Cohort* | % of Institutions |
|----------------------------------|----------------|-------|--------------|-------------------|
| 1 - High                         | 21             | 406   | 32%          | 8%                |
| 2 - Medium                       | 54             | 454   | 36%          | 20%               |
| 3 - Low                          | 201            | 412   | 32%          | 72%               |

368 \*Based on 1,272 ENI employed at time of index award at US, non-commercial institutions, divided into 3  
369 approximately equal groups according to the average number of ENIs per institution. 181 ENI from 103  
370 US companies and 78 foreign institutions excluded.

371 <sup>+</sup>High = 14 to 37 ENI per inst.; Medium = 6 to 13 ENI per inst.; Low = 1 to 5 ENI per inst.

372

### 373 **Index Award Characteristics**

374

375 ENI index awards included research projects, multi-project programs and centers, and multi-project  
376 cooperative agreements. More than three fourths of the awards were research project R01, 14% were

377 research project U01, and the remaining 8% were multi-project awards. The distribution of index  
378 awards by activity type codes is shown in Fig 2.

379

380 **Fig 2. ENI Index Award Grant Activity Types**

381

382 The vast majority of index awards (96%) were new (Type 1) awards, while a small proportion (4%) were  
383 renewal (Type 2) awards, meaning another PI began the project, but the study ENI submitted the  
384 competing renewal application (Table 6). Slightly more than half of the index awards (53%) were from  
385 resubmission applications, i.e. applications that had been revised from prior unfunded versions  
386 (formerly called amended applications). A small proportion of index awards (7%) were sub-projects.  
387 That is, the ENI was a project director of a sub-project on a multi-project grant. The median percentile  
388 score of all index awards was 13.7 (mean 15.7).

389

390 **Table 6. Index Award Characteristics**

| Index Awards                   | # Awards    | % of Index Awards |
|--------------------------------|-------------|-------------------|
| Renewals                       | 53          | 4%                |
| Resubmissions                  | 793         | 47%               |
| Subprojects                    | 105         | 7%                |
|                                |             |                   |
| Median percentile score (mean) | 13.7 (15.7) |                   |

391

392

393 **ENI Funding Outcomes**

394

395 Our primary outcome of interest was whether an ENI received at least one new or renewal R01-e NIH  
396 grant award after the IFY. We refer to this outcome interchangeably as an “ENI funding outcome”, “ENI  
397 funding success”, or “ENI funding rate”. The ENI funding rate is the percentage of ENI within a particular  
398 comparison group, either across the entire period of the study or a specified period of time, successful  
399 in obtaining at least one R01-e grant after the IFY; it is calculated by dividing the number of ENI who  
400 received a post-IFY R01-e grant by the number of ENI in the comparison group or category.

401

402 Funding outcomes according to demographic, PI background, and index institutional characteristics  
403 were derived from the whole cohort (n = 1,496 ENI). Funding outcomes according to the PI’s application  
404 submission behaviors and application quality indices (i.e. all PI SCORECARD items) were derived using  
405 only ENI who submitted applications after the IFY (n = 1,322 ENI).

406

407 Ultimately, 57% of the cohort were funded and 43% were unfunded (Table 7). However, ENI from the  
408 first 4 cohort years had a statistically higher overall funding rate than ENI from the latter 4 years (60%  
409 versus 53%, respectively,  $p < 0.004$ ). About 12% (174 ENI) did not apply for additional grants post-IFY.  
410 Of those who continued to apply, 65% were ultimately funded and 35% were not funded again. When  
411 we looked at the percentage of the cohort who remained active at least 5 years after receiving their  
412 index award – whether or not they had obtained new funding by then – 77% of the cohort remained,  
413 and 23% had dropped out (Table 8). Almost half (45%) of the unfunded ENI dropped out by their fifth  
414 year.

415

416 **Table 7. ENI Funding Outcomes per Cohort Year**

| Cohort Year | # ENI in Cohort Year | # Unfunded ENI | # Funded ENI | % ENI Funded | % ENI Funded                 |
|-------------|----------------------|----------------|--------------|--------------|------------------------------|
| 2003        | 236                  | 79             | 157          | 66%          | <b>60%</b>                   |
| 2004        | 185                  | 73             | 112          | 61%          |                              |
| 2005        | 194                  | 88             | 106          | 55%          |                              |
| 2006        | 167                  | 67             | 100          | 60%          |                              |
| 2007        | 199                  | 96             | 103          | 52%          | <b>53%</b>                   |
| 2008        | 151                  | 66             | 85           | 57%          |                              |
| 2009        | 197                  | 98             | 99           | 50%          |                              |
| 2010        | 167                  | 74             | 93           | 56%          |                              |
| All Years   | 1496                 | 641            | 855          | <b>57%</b>   | <b><i>p</i> &lt; 0.004 *</b> |

417 Numbers in table Include full cohort (n = 1,496 ENI)

418 \*Pearson's  $\chi^2$  test, 2003-2006 versus 2007-2010,  $\chi^2 = 8.3154$ , df = 1, *p*-value = 0.003931

419

420

421 **Table 8. Percentage of ENI Who Remained in R01-e Applicant Pool 5 or More Years After Index Award**

| Outcome Group | # ENI Starting | # ENI Remaining | % ENI Remaining | % ENI Dropped out |
|---------------|----------------|-----------------|-----------------|-------------------|
| Unfunded      | 641            | 353             | 55%             | 45%               |
| Funded        | 855            | 800             | 94%             | 6%                |
| <b>Total</b>  | <b>1496</b>    | <b>1153</b>     | <b>77%</b>      | <b>23%</b>        |

422

423

424 **Demographic, PI Background and Index Institution Characteristics**

425

426 We found statistically significant differences between the funded and unfunded ENI according to some  
 427 of the demographic characteristics (Table 9 ). Funded ENI were, on average, 3 years younger than  
 428 unfunded ENI when they received their index award (median 40 y versus 43 y,  $p < 0.0001$ ). In addition,  
 429 funded ENI were born, on average, 2.5 years (median 2.2 years) later than unfunded ENI ( $p < 0.0001$ ).  
 430 There were no differences in percentages of males and females funded. A larger proportion of US-born  
 431 ENI were funded compared to foreign-born ENI (63% versus 54%,  $p = 0.006$ ). In terms of race and  
 432 ethnicity, White ENI had the highest funding rate (61%), followed by AA/MR (59%), Asian (55%), and  
 433 Hispanic (53%) ENI. Among the ENI for whom race/ethnicity data were missing or withheld (M/W), 34%  
 434 were funded. There were 2 Native ENI in the cohort, and both were funded. When we performed a  $\chi^2$   
 435 test for differences in funding rates across the race/ethnic groups – excluding the M/W – the differences  
 436 were not statistically significant.

437

438 **Table 9. Funding Outcomes According to ENI Demographic Characteristics**

| <b>Gender</b>                                                              | <b># ENI</b> | <b>% Funded</b> | <b>p-value</b> |
|----------------------------------------------------------------------------|--------------|-----------------|----------------|
| Female                                                                     | 396          | 57%             | 0.7 (ns)       |
| Male                                                                       | 1074         | 58%             |                |
| Pearson's $\chi^2$ test, $\chi^2 = 0.1$ , $df = 1$ , $p$ -value = 0.7 (ns) |              |                 |                |
|                                                                            |              |                 |                |
| <b>Birth Country</b>                                                       | <b># ENI</b> | <b>% Funded</b> | <b>p-value</b> |
| Foreign                                                                    | 322          | 54%             | 0.006          |
| US                                                                         | 979          | 63%             |                |
| Pearson's $\chi^2$ test, $\chi^2 = 8$ , $df = 1$ , $p$ -value = 0.006      |              |                 |                |
|                                                                            |              |                 |                |

| <b>DOB</b>                                                                                                             | <b>Unfunded ENI</b> | <b>Funded ENI</b> | <b>p-value</b>  |
|------------------------------------------------------------------------------------------------------------------------|---------------------|-------------------|-----------------|
| Mean                                                                                                                   | 7/11/1962           | 1/15/1965         | < 0.0001        |
| Median                                                                                                                 | 11/28/1963          | 1/26/1966         |                 |
| Welch Two Sample t-test (using date number), t = -6, df = 1000, p-value = 1e-09, 95% CI: -1215 -624                    |                     |                   |                 |
|                                                                                                                        |                     |                   |                 |
| <b>Age at Index Award</b>                                                                                              | <b>Unfunded ENI</b> | <b>Funded ENI</b> | <b>p-value</b>  |
| Mean (y)                                                                                                               | 44                  | 41                | < 0.0001        |
| Median (y)                                                                                                             | 43                  | 40                |                 |
| Welch Two Sample t-test, t = -7.901, df = 1129.1, p-value = 6.53e-15, 95 % CI: -3.8059 -2.2917                         |                     |                   |                 |
|                                                                                                                        |                     |                   |                 |
| <b>Race/Ethnicity</b>                                                                                                  | <b># ENI</b>        | <b>% Funded</b>   | <b>p-value*</b> |
| AA, MR*                                                                                                                | 29                  | 59%               | 0.20 (ns)       |
| Hispanic                                                                                                               | 78                  | 53%               |                 |
| Asian                                                                                                                  | 301                 | 55%               |                 |
| White                                                                                                                  | 954                 | 61%               |                 |
| Native**                                                                                                               | 2                   | 100%              |                 |
| M/W***                                                                                                                 | 132                 | 34%               |                 |
| *African American, Multi-racial; **American Indian, Alaskan Native; ***Missing/Withheld                                |                     |                   |                 |
| *Pearson's $\chi^2$ test, excluding Native (due to small cell n) and M/W, $\chi^2 = 4.5872$ , df = 3, p-value = 0.2046 |                     |                   |                 |

439

440

441 PI research training and institutional characteristics were all significantly associated with ENI funding  
442 outcomes (Table 10). ENI with an MD degree had a 64% funding rate, followed by those with an  
443 MD/PhD (62%), PhD (or equivalent) (55%), and Other degree (32%) (  $p = 0.004$ ). Former recipients of an  
444 NIH K award had a higher funding rate than non-recipients (66% vs 55%,  $p = 0.002$ ). ENI employed at a  
445 US institution at the time of their index awards had a higher funding rate than those employed at



446 foreign institutions (60% vs 26%,  $p < 0.0001$ ). Those whose index institutions were independent  
 447 hospitals had the highest funding rates (68%), followed by medical schools (65%), other health or health  
 448 related (e.g. not-for-profit, community service, international) organizations (64%), institutions of higher  
 449 education (56%), and independent research organizations (52%) ( $p < 0.003$ ).

450

451 **Table 10. Funding Outcome According to PI Background and Index Institution**

| Degree Group                                                                            | # ENI | % ENI Funded | <i>p</i> -value |
|-----------------------------------------------------------------------------------------|-------|--------------|-----------------|
| MD                                                                                      | 289   | 63%          | 0.04            |
| MD/PhD                                                                                  | 171   | 62%          |                 |
| PhD                                                                                     | 1016  | 55%          |                 |
| Other                                                                                   | 20    | 32%          |                 |
| Pearson's $\chi^2$ test, excluding Other, $\chi^2 = 6.5$ , $df = 2$ , $p$ -value = 0.04 |       |              |                 |
|                                                                                         |       |              |                 |
| K Award                                                                                 | # ENI | % ENI Funded | <i>p</i> -value |
| Yes                                                                                     | 247   | 66%          | 0.002           |
| No                                                                                      | 1249  | 55%          |                 |
| Pearson's $\chi^2$ test, $\chi^2 = 10$ , $df = 1$ , $p$ -value = 0.002                  |       |              |                 |
|                                                                                         |       |              |                 |
| Institution US                                                                          | # ENI | % ENI Funded | <i>p</i> -value |
| US                                                                                      | 1371  | 60%          | < 0.0001        |
| Foreign                                                                                 | 125   | 26%          |                 |
| Pearson's $\chi^2$ test, $\chi^2 = 50$ , $df = 1$ , $p$ -value = 8e-13                  |       |              |                 |
|                                                                                         |       |              |                 |
| Institution Type                                                                        | # ENI | % ENI Funded | <i>p</i> -value |
| Independent Hospital                                                                    | 130   | 68%          | < 0.003         |

|                                                                               |              |                     |                       |
|-------------------------------------------------------------------------------|--------------|---------------------|-----------------------|
| Oth Health, Health-rel.,<br>community svcs.                                   | 36           | 64%                 |                       |
| Medical School                                                                | 429          | 64%                 |                       |
| Institution of Higher Ed.                                                     | 636          | 56%                 |                       |
| Research Organization                                                         | 156          | 52%                 |                       |
| Pearson's $\chi^2$ test, $\chi^2 = 16.055$ , $df = 4$ , $p$ -value = 0.002947 |              |                     |                       |
|                                                                               |              |                     |                       |
| <b>ENI Density Tertile<sup>+</sup></b>                                        | <b># ENI</b> | <b>% ENI Funded</b> | <b><i>p</i>-value</b> |
| 1 – High                                                                      | 406          | 70%                 | < 0.0001              |
| 2 – Med                                                                       | 454          | 65%                 |                       |
| 3 – Low                                                                       | 511          | 47%                 |                       |
| Pearson's $\chi^2$ test, $\chi^2 = 60$ , $df = 2$ , $p$ -value = 7e-13        |              |                     |                       |

452 <sup>+</sup>High = 14 to 37 ENI per inst.; Medium = 6 to 13 ENI per inst.; Low = 1 to 5 ENI per inst.

453

454 Institutional ENI density was also significant, with ENI from high- and medium-ENI density institutions  
 455 being more likely to be funded (70% and 65%, respectively) than ENI from low-ENI density institutions  
 456 (47%) ( $p < 0.0001$ ). Perhaps not surprisingly, given that institutions in the top 2 tertiles correspond to  
 457 the top funded NIH institutions, the highest rate of ENI funding success (70%) was in the institution  
 458 density tertile with the smallest number (21) of institutions (Fig 3).

459

460 **Fig 3. ENI Funding Outcomes by Index Institution ENI Density.** Index institution density tertiles: 1 = 14  
 461 to 37 ENI per institution; 2 = 6 to 13 ENI per institution; 3 = 1 to 5 ENI per institution. ENI from  
 462 institutions in tertiles 1 and 2 were more likely to be funded (70% and 65%, respectively) than ENI from  
 463 institutions in tertile 3 (47%) ( $p < 0.0001$ ). The highest ENI funding rate (70%) was in the 1<sup>st</sup> tertile,  
 464 which included just 21 institutions.

465

466 **PI SCORECARD Factors**

467

468 There were several statistically significant differences between funded and unfunded ENI according to PI  
 469 SCORECARD factors (Table 11). Funded ENI had: 1) lower median PI SCORES (22.4 versus 26.7,  
 470 unfunded ENI,  $p < 0.0001$ ); 2) lower median PI QUALITY (33% of applications triaged versus 50%  
 471 triaged, unfunded ENI,  $p < 0.0001$ ); 3) lower median INDEX scores (12.4 versus 14.9, unfunded ENI,  $p =$   
 472  $0.005$ ); 4) higher median FREQUENCY rates (1.1 applications per year versus 0.8 applications per year  
 473 for unfunded ENI, a difference of 27%,  $p = 0.0004$ ); 5) faster median SPEED from IFY to next  
 474 application (0.7 years versus 1.3 years, unfunded ENI,  $p = 0.005$ ); 6) lower median REACH percentages  
 475 (86% of applications to a single IC versus 100% for unfunded ENI,  $p = 0.004$ ); 7) greater median RENEW  
 476 percentages (17% of applications as renewals versus 10% as renewals, unfunded ENI,  $p < 0.0001$ ); and  
 477 8) longer median ACTIVE times (8.7 years from IFY to final grant application (or FY 2016), versus 5.4  
 478 years for unfunded ENI,  $p < 0.0001$ ). There was no difference between funded and unfunded ENI in the  
 479 median percentage of the PI's applications submitted as resubmissions (RESUB), with 30% for funded  
 480 ENI and 33% for unfunded ENI ( $p = 0.30$ , n.s.).

481

482 **Table 11. Funding Outcomes According to PI SCORECARD Factors**

| Factor  | Unfunded ENI* | Funded ENI* | Test                                                                                | $p$ -values |
|---------|---------------|-------------|-------------------------------------------------------------------------------------|-------------|
| SCORE   | 26.7 pctl     | 22.4 pctl   | Welch Two Sample t-test, $t = -2.8$ , $p$ -value =<br>0.005, 95 % CI: -2.886 -0.520 | < 0.005     |
| QUALITY | 50%           | 33%         | Welch Two Sample t-test, $t = -16$ , $p$ -value<br><2e-16, 95 % CI: -0.2174 -0.1698 | < 0.0001    |

|                  |            |            |                                                                                              |          |
|------------------|------------|------------|----------------------------------------------------------------------------------------------|----------|
| <b>INDEX</b>     | 14.9 pctl  | 12.4 pctl  | Welch Two Sample t-test, $t = -6.0015$ , $p$ -value = $2.591e-09$ , 95 % CI: -4.7354 -2.4021 | < 0.0001 |
| <b>FREQUENCY</b> | 0.8 apps/y | 1.1 apps/y | Welch Two Sample t-test, $t = 3.9$ , $p$ -value = $1e-04$ , 95% CI: 0.0836 0.2549            | < 0.0001 |
| <b>SPEED</b>     | 1.3 y      | 0.7 y      | Welch Two Sample t-test, $t = -5.3$ , $p$ -value = $1e-07$ , 95% CI: -0.9144 -0.4221         | < 0.0001 |
| <b>REACH</b>     | 100%       | 86%        | Welch Two Sample t-test, $t = -2.9$ , $p$ -value = 0.004, 95% CI: -0.0733 -0.0143            | 0.004    |
| <b>RENEW</b>     | 10%        | 17%        | Welch Two Sample t-test, $t = 4.3$ , $p$ -value = $2e-05$ , 95% CI: 0.0274 0.0734            | < 0.0001 |
| <b>RESUB</b>     | 33%        | 30%        | Welch Two Sample t-test, $t = -1.1$ , $p$ -value = 0.3, 95% CI: -0.0351 0.0094               | 0.3 (ns) |
| <b>ACTIVE</b>    | 5.4 y      | 8.7 y      | Welch Two Sample t-test, $t = 22.088$ , $p$ -value < $2.2e-16$ , 95% CI: 3.2698 3.9073       | < 0.0001 |

483 \*Medians displayed

484

485 Given that ENI entered the cohort at different times, and funded ENI were generally born later than  
 486 unfunded ENI, we further investigated some of the significant SCORECARD factors, to rule out or adjust  
 487 for age and time effects. We repeated the analysis of ACTIVE for each cohort year. There were  
 488 significant differences in the lengths of time ENI were ACTIVE between funded and unfunded ENI in  
 489 every cohort year, except in 2010 (S1 Table.) The largest difference was in 2003 (6.3 y), and differences  
 490 gradually diminished with each subsequent cohort year. This would be expected, as proportionally  
 491 more of the unfunded ENI from the early years would have dropped out, and proportionally more of the  
 492 funded ENI would have remained active.

493

## **S1 Table. Mean Number of Years ENI Continued to Apply for NIH Grants**

494

495 Because funded ENI were on average 2.5 years younger than unfunded ENI, we wanted to be sure the  
496 difference in FREQUENCY of application submission per PI was not the result of their age difference.  
497 We took all ENI applications (approximately 10,000 after excluding subprojects) and plotted the number  
498 of applications submitted against PI age at time of submission (S1 Fig). The plot showed that even  
499 though funded ENI submitted many more applications than unfunded ENI (as expected), there was an  
500 identical pattern of application submission frequency relative to PI age at time of submission in both  
501 groups. ENI submitted the most applications between the ages of 42 and 44 years, very few  
502 applications before the age of 35, and they continued to submit applications through their mid-sixties, in  
503 both groups. These findings confirm that age *per se* was not driving the higher frequency of application  
504 submission among the funded ENI.

505

### **S1 Fig. Frequency of application submission according to PI age at time of submission**

507

508 We also examined whether PI SCORECARD findings held up across cohort years and study observation  
509 years. First, we looked at index award scores (INDEX) according to ENI cohort year (Fig 4). Index scores  
510 did vary from year to year, but that was not surprising because NIAID's R01 payline does change from  
511 year to year [42]. However, unexpectedly, index award scores of funded and unfunded ENI were  
512 statistically different in cohort years 2003, 2005, 2006, 2007, and 2009. In 2004, 2008 and 2010, index  
513 scores were not statistically different. Two factors come into play in understanding this. First, a normal  
514 part of the NIAID funding process every year is to select some additional R01 applications that did not  
515 score within the payline, and award funding (a process called "select pay") [43]. Priority for select pay is

516 frequently given to new investigators (NI). Second, starting in 2006, NIAID established special  
517 (preferential) paylines for NI R01 grants. So, between 2006 and 2010, there were NI preferential  
518 paylines, in addition to select pay, which were used to fund R01 grants *above the NI payline*. We looked  
519 at ENI index award scores between FYs 2006 and 2010, and found that ENI whose awards were paid at  
520 or below the NI payline were more often successfully funded, than those whose awards were paid  
521 above the NI payline, and the difference was statistically significant (60% versus 48%,  $\chi^2$  test,  $p$ -value <  
522 0.004, S2 Table). Thus, some NI received their index awards having scores well above normal paylines  
523 and this may have conferred a disadvantage later in competing effectively at normal paylines.

524

525 **Fig 4. ENI Index Award Scores by Cohort Year.** Index scores varied from cohort year to cohort year, a  
526 result of normal NIAID R01 payline changes from year to year. Unexpectedly, index award scores of  
527 funded and unfunded ENI were statistically different in cohort years 2003, 2005, 2006, 2007, and 2009.  
528 In 2004, 2008 and 2010, index scores were not statistically different.

529

530 **S2 Table. ENI Funding Success According to Index Award Score Above or Below NI Payline**

531

532 Next, we examined the year-over-year differences between funded and unfunded ENI in terms of the  
533 total number of applications they submitted and how many of them were triaged (versus scored, Fig 5).  
534 For this analysis we included only applications from the 1,322 ENI who applied for grants post-IFY, and  
535 we excluded index awards. Between FYs 2003 and 2016, funded ENI submitted a total of 8,026  
536 applications, of which 3,292 (39%) were triaged; unfunded ENI submitted a total of 2,202 applications,  
537 of which 1,470 (63%) were triaged. In both groups, the number of applications submitted continued to  
538 increase from 2003 through 2010, while new ENI were still coming into the cohort (black dotted line in  
539 Fig 5). After 2010, the number of applications per year submitted by unfunded ENI remained relatively

540 steady through 2016, as did the proportion of those applications triaged. In the funded group, the  
541 number of applications submitted each year continued to increase after 2010, but at a less steady pace  
542 than 2003 to 2010, and the proportion of applications triaged each year was relatively constant. Thus,  
543 funded ENI not only submitted more applications per year than unfunded ENI, even while the cohort  
544 was still growing, but consistently had a higher proportion of their applications scored, rather than  
545 triaged. The differences we see in years 2003 through 2010 suggests funded ENI had an ability *from the*  
546 *start* to write higher quality applications than unfunded ENI. This superior grant writing ability appears  
547 to be another early advantage funded ENI had, which may have conferred a lasting benefit to them.

548

549 **Fig 5. Applications Scored and Triaged from Funded and Unfunded ENI.** Figure includes 10,228  
550 applications from 1,322 ENI who submitted applications after the IFY. (Index applications are excluded.)  
551 Funded ENI submitted 8,026 applications, of which 39% were triaged; unfunded ENI submitted 2,202  
552 applications, of which 63% were triaged. The number of applications from both groups increased  
553 between 2003 and 2010, while the cohort was still growing (black dotted line), but more rapidly from  
554 funded ENI. Funded ENI consistently had fewer of their applications triaged, even in the early years,  
555 suggesting they had an early advantage in grant writing ability.

556

557 Lastly, we scrutinized the difference between funded and unfunded ENI in terms of average PI  
558 application scores over time, starting in 2011 when no additional ENI were entering the cohort. That is,  
559 we used all scored applications submitted by ENI who continued to apply for grants between FYs 2011  
560 and 2016 (n = 3,093 applications total). For each year, an average *PI ANNUAL Score* was calculated (for  
561 both funded and unfunded ENI) as follows: any ENI who submitted one or more scored applications in  
562 the year received an individual *ANNUAL Score*, equal to the average percentile score of his/her scored  
563 applications. If an ENI submitted only one scored applicaton, his/her individual ANNUAL Score was

564 equal to the score of that application. Each year's PI ANNUAL Score was the average of the individual  
565 ANNUAL Scores – that is, the sum of the individual ANNUAL Scores, divided by the number of individual  
566 ANNUAL Scores. As such, only ENI who submitted scored applications in a given year contributed to  
567 that year's average PI ANNUAL Score. As shown in Fig 6, average PI ANNUAL Scores were markedly  
568 different between the funded and unfunded ENI, with funded ENI having PI ANNUAL Scores about 10  
569 percentile points lower each year between 2011 and 2016. Overall, the mean PI ANNUAL Score for the  
570 funded ENI was 10.9 percentile points lower than that for the unfunded ENI (23.9 versus 34.8,  
571 respectively,  $p < 0.0001$ ).

572

573 **Fig 6. Average PI ANNUAL Scores, FY 2011 – FY 2016.** The PI ANNUAL Score each year is the average of  
574 individual PI ANNUAL scores of ENI who submitted scored applications. Average PI ANNUAL Scores were  
575 markedly different between the funded and unfunded ENI, with funded ENI having PI ANNUAL Scores  
576 about 10 percentile points lower each year between 2011 and 2016. (Welch Two Sample t-tests: in all  
577 years  $p$ -values  $< 0.0001$ .)

578

579 When we looked at the distributions of PI average application ANNUAL Scores within the two ENI  
580 groups, in each year, funded ENI not only had a broader range of ANNUAL Scores than unfunded ENI,  
581 they also submitted many more scored applications than unfunded ENI (S2a and S2b Figs). S2a Fig  
582 shows the distribution of ANNUAL Scores for funded and unfunded ENI in FY 2012; S2b Fig shows the  
583 distribution of scores as well as the cumulative numbers of ENI contributing to those scores in each  
584 group. FY 2012 is typical of all the years between 2011 and 2016.

585

586 **S2a Fig. Average PI ANNUAL Scores, FY 2012**

587



588 **S2b Fig. Average PI ANNUAL Scores and Cumulative Numbers of ENI, FY 2012**

589

## 590 **Regression Analyses**

591

592 Having identified numerous statistically significant associations between ENI funding outcomes and  
593 independent demographic, PI background, institutional, and PI SCORECARD variables, we wanted to  
594 understand the strength of each of these variables in predicting, individually and collectively, the  
595 likelihood of ENI funding success. We performed univariate and multivariate logistic regression  
596 analyses, and discuss our results.

597

598 The strength of individual independent variables in predicting ENI funding success was assessed using  
599 univariate logistic regression analyses. Each of the independent variables was converted to a binomial,  
600 with values 1 or 0 indicating the test condition was met or not met, respectively. The results are  
601 shown in Table 12. All but 3 of the 21 variables tested were statistically significant predictors. The  
602 strongest predictors were among the PI SCORECARD factors and included the PI submitting: more  
603 renewal applications (RENEW); more applications to different NIH ICs (REACH); more applications per  
604 year (FREQUENCY); and fewer applications triaged (QUALITY). Having a lower index award score  
605 (INDEX) was also predictive of funding success. RENEW, REACH and FREQUENCY increased the odds of  
606 an ENI being funded by 2.8-, 2.8-, and 2.4-fold, respectively. QUALITY and INDEX each increased the  
607 odds by 1.6-fold. Demographic and institutional factors that were also highly predictive included the PI  
608 being: younger at receipt of the index award; younger generally (i.e. born later); white; and employed at  
609 the time of the index award at a US institution, an independent hospital or medical school, or an ENI-  
610 dense institution. Institutional EEI density – which correlates with NIH funding level – increased the  
611 odds of an ENI being funded by almost 3-fold. Additional PI SCORECARD factors that increased the

612 chance of funding success by about 30% each included the PI having a lower average application score  
 613 (SCORE), and a shorter time between the index award and the next application (SPEED). Other  
 614 demographic and institutional factors predictive of funding included the PI having: an MD or MD/PhD  
 615 degree, a prior K award, the index award before 2006; a renewal index award; and US birth. Having  
 616 more resubmission applications (RESUB), a resubmission index award, and gender, were not statistically  
 617 significant predictors.

618

619 **Table 12. Univariate Regression of Independent Variables on ENI Funding Success**

| <b>Predictor Variable*</b> | <b>Predictor Value Tested<sup>+</sup></b>                   | <b>Odds Ratio<sup>o</sup></b> | <b>p-value</b> |
|----------------------------|-------------------------------------------------------------|-------------------------------|----------------|
| <b>RENEW</b>               | % PI's apps=renewal ≥ median                                | 2.83                          | < 0.0001       |
| <b>REACH</b>               | % PI's apps to single NIH IC < median                       | 2.75                          | < 0.0001       |
| <b>FREQUENCY</b>           | PI's average # of apps per year ≥ median                    | 2.44                          | < 0.0001       |
| <b>QUALITY</b>             | % PI's apps triaged < median                                | 1.63                          | < 0.0001       |
| <b>INDEX</b>               | PI's index award score < median                             | 1.63                          | < 0.0001       |
| <b>Ageindx</b>             | Age at index award < median                                 | 2.10                          | < 0.0001       |
| <b>density</b>             | Index inst density = 1 or 2                                 | 2.73                          | < 0.0001       |
| <b>hospMS</b>              | Index inst type = independent hospital or<br>medical school | 1.76                          | < 0.0001       |
| <b>instUS</b>              | Index inst = US inst                                        | 4.17                          | < 0.0001       |
| <b>dob</b>                 | Date of birth ≥ median (PI is younger)                      | 1.62                          | < 0.0001       |
| <b>raceW</b>               | Race = white                                                | 1.55                          | < 0.0001       |
| <b>kaward</b>              | Had K award                                                 | 1.60                          | < 0.005        |
| <b>indrenew</b>            | Index app = renewal                                         | 2.64                          | < 0.005        |

|                 |                                                            |      |         |
|-----------------|------------------------------------------------------------|------|---------|
| <b>Birth</b>    | Birth country = US                                         | 1.44 | < 0.005 |
| <b>SCORE</b>    | PI's average app score < median                            | 1.33 | < 0.05  |
| <b>SPEED</b>    | Time between index award and first subsequent app < median | 1.27 | < 0.05  |
| <b>hasMD</b>    | Degree = MD or MD/PhD                                      | 1.37 | < 0.05  |
| <b>IFY</b>      | IFY < median (< 2006)                                      | 1.31 | < 0.05  |
| <b>RESUB</b>    | % PI's apps=resub $\geq$ median                            | 1.09 | ns      |
| <b>gender</b>   | Gender = male                                              | 1.05 | ns      |
| <b>indresub</b> | Index = resub                                              | 1.01 | ns      |

620 \*PI SCORECARD variables in all CAPS; \*app=application, inst=institution, resub=resubmission; ° increase  
 621 in odds of being funded with factor.

622

623 In addition to wanting to know the impact of individual independent variables on ENI funding success,

624 we wanted to understand how the effect of these variables changed when considered in a multivariate

625 model. When we fit all the independent variables into a generalized linear model using multivariate

626 logistic regression, we found that QUALITY, SCORE, RENEW, and FREQUENCY prevailed as the most

627 highly significant predictor variables, with QUALITY conferring a 5-fold increase in the odds of ENI

628 funding success and SCORE, RENEW and FREQUENCY each conferring more than a 2-fold increase in the

629 odds of funding success (S3 Table). RESUB, REACH, density, and ageindx also remained statistically

630 significant predictors, each conferring, on average, a 1.6-fold increase in the odds of success. Most of

631 the other variables – primarily demographic and institutional factors – lost their statistical significance or

632 remained only weakly significant in the multivariate model.

633

634 **S3 Table. Multivariate Regression of Independent Variables on ENI Funding Success**

635  
636 Finally, we wanted to better understand how important each of the predictive factors were relative to  
637 one another when considered altogether. For this analysis, we used Random Forest Variable  
638 Importance (RFVI) modeling, which accounts for correlations and any interactions among the variables,  
639 and ranks the independent variables in order of their importance. By far, the percentage of the PI's  
640 applications triaged (QUALITY) was the strongest predictor in the model (Fig 7). The next most  
641 important predictors (in order of their importance) were the PI's: average number of applications  
642 submitted per year (FREQUENCY); percentage of renewal applications (RENEW); average application  
643 score (SCORE); percentages of resubmission applications (RESUB) and applications submitted to multiple  
644 NIH ICs (REACH); and the index institution ENI density. The variables with the least importance were  
645 having a Type 2 index award and a US index institution; having a K award ranked just slightly higher. All  
646 the remaining variables had approximately equivalent predictive strength.

647  
648 **Fig 7. Variable Importance in Prediction of ENI Funding Success.** RFVI analysis ranked all independent  
649 variables included in multivariate modeling in order of importance in predicting ENI funding success.  
650 The strongest predictor was the percent of the PI's applications triaged (QUALITY), followed by the PI's:  
651 average applications per year (FREQUENCY); percent of renewal applications (RENEW); average  
652 application score (SCORE); percent of resubmissions (RESUB) and applications to multiple NIH ICs  
653 (REACH); and the index institution ENI density. Having a K award, a renewal index award and a US index  
654 institution, were the least important predictors. All of the other variables had approximately equal  
655 predictive strength.

656

657

658 **Discussion**

659

## 660 **The Out-of-Balance Biomedical Workforce**

661

662 There is widespread recognition that the current funding structure of the US biomedical research  
663 enterprise is severely imbalanced [1, 3, 44-46]. Science organizations and thought leaders have called  
664 for broad structural reforms and proposed strategies for reversing these declines [4, 47-49]. Some of  
665 the many proposed solutions include: amplifying programs to support early- and mid-career stage  
666 investigators [6, 50-52]; funding people instead of projects [46, 53, 54]; reducing the size of  
667 laboratories, of awards, or of numbers of NIH grants an investigator may hold at any one time [6, 46, 47,  
668 55, 56]; and reducing NIH support for investigator salaries and reliance on soft-money positions [2, 47].

669

670 These solutions have various levels of support in the biomedical research community, but they all  
671 represent significant structural and/or institutional reforms, and as such, none are easy to implement.  
672 That said, more practical answers may arise from a better understanding of how funding agencies and  
673 institutions can better support early-career scientists who are most at risk. This understanding could  
674 identify specific interventions by institutions and funding agencies, and behaviors of the researchers  
675 themselves, that could enhance their competitiveness.

676

## 677 **Factors Contributing to ENI Success in a Hypercompetitive**

### 678 **Environment**

679

680 We studied a cohort of 1,496 ENI who received their first R01-e awards from NIAID between FYs 2003  
681 and 2010. This was a period of no overall growth in the NIH inflation-adjusted budget and the steepest

682 declines in success rates in NIH history [57]. Ironically, the number of research grant applications  
683 continued to grow during this period, primarily due to an increase in the absolute number of applicants  
684 [58, 59]. We tracked the cohort's ENI grant applications and funding outcomes, from their first R01-e  
685 awards through their final application submissions, or FY 2016, whichever came first. Despite the  
686 challenges facing these early-career scientists during this period, over half of the cohort was successful  
687 in obtaining subsequent NIH funding.

688

689 We were able to identify many factors that differentiated ENI who were successful in obtaining  
690 additional R01-e grants after their index award) from those who were not successful. Using these  
691 factors, we constructed a model that would predict the likelihood of a cohort ENI successfully obtaining  
692 additional funding. Characteristics that differentiated successful from unsuccessful ENI fell into 3 major  
693 categories: 1) unalterable PI personal attributes; 2) PI background and institutional factors; and 3) PI  
694 grant quality and grant submission behaviors.

695

696 ENI from the early cohort years (2003 – 2006) had higher funding rates than ENI from the later cohort  
697 years (2007 – 2010). This may be due in part to higher R01 paylines in the years the early cohort ENI  
698 competed for new funding. For most of the early cohort ENI it may also be due to an absence of  
699 preferential NI paylines: early cohort ENI had to compete against established investigators for their first  
700 R01-e awards without the benefit of preferential paylines. This may have prepared them better for  
701 competition later at normal paylines.

702

703 Funded ENI were, on average, 2.5 years younger than unfunded ENI, within each cohort year. Funded  
704 ENI also received their index awards at an average age of 40 years, compared to an average age of 43  
705 years among unfunded ENI. We considered the possibility that the earlier age at index award may

706 reflect, in part, changes in the NIH new investigator policies between 2007 and 2009, including  
707 establishment of numerical benchmarks for new investigator awards, comparable type-1 R01 success  
708 rates between new and established investigators, and identification of “Early Stage Investigators” [60].  
709 In our study, ENI from cohort years 2003 through 2006 would not have benefited from these policies.  
710 We did not find significant differences between funded and unfunded ENI from the first 4 cohort years  
711 compared to those from the second 4 cohort years in birth date and age at index award. This suggests  
712 that any effect of age on subsequent ENI funding success was independent of NIH policy changes during  
713 the observational period. Why such seemingly small differences in age might make a difference in ENI  
714 outcomes remains unclear.

715

716 Our findings that ENI funding rates were highest in independent hospitals and medical schools, and that  
717 ENI with MD or MD/PhD degrees had higher funding rates than ENI with PhD degrees within  
718 independent hospitals, medical schools, and research organizations, is consistent with NIH reporting  
719 [61-63]. Historically, medical schools have received the largest share of NIH funding [40].

720

721 We also found higher ENI funding rates in institutions with the highest ENI densities and learned that  
722 our ENI density tertiles correspond well with institutional level of NIH funding. Ginther et al., in their  
723 study of over 40,000 investigators from FYs 2000 to 2006, reported that working at one of the top 30  
724 institutions, ranked by total NIH grant funding, increased an investigator’s R01 award probability by 9.7  
725 percentage points, and those working at institutions ranked 31-100 increased R01 award probability by  
726 6.1 percentage points [64]. In our study, there were 75 institutions (27% of all the institutions) in the  
727 top two ENI density tertiles. The 860 ENI (i.e. 2/3 of the cohort) who received their index awards while  
728 at an institution in one of these two tertiles had an average funding rate of 67%. In contrast, 511 ENI  
729 employed at the time of their index award at institutions in the bottom tertile, comprised of 201

730 institutions (i.e. 73% of the institutions), had a funding rate of 47%. It is tempting to speculate that  
731 institutions with relatively high ENI densities provide an environment where younger early-career  
732 researchers can share ideas and pursue more innovative projects.  
733  
734 PI SCORECARD factors were surprisingly effective in identifying factors preferentially associated with  
735 funded ENI. Compared to unfunded ENI, funded ENI submitted 20% more applications per person per  
736 year, nearly 30% more of their applications to different NIH ICs, 30% more of their applications as  
737 renewals, and their first post-IFY applications on average about 8 months sooner. Submission of more  
738 applications to different NIH ICs suggests these projects had broad scope and relevance, opening extra  
739 opportunities to seek funding from multiple ICs. Submission of more renewal applications suggests  
740 these ENI had achieved most of the objectives of their original grants, leading them to be more strategic  
741 and competitive: NIH data show, for both new and experienced investigators, renewal applications have  
742 higher success rates than new applications [65]. But NIH data also show that first renewal applications  
743 from ENI have lower success rates than all renewal applications from established investigators, because  
744 all renewals from established investigators include new as well as long-term projects, which have even  
745 higher success rates than first renewals [66].  
746  
747 Finally, if we compare our study cohort with the 1983-2003 NIAID cohort depicted in Fig 1, we can make  
748 two observations: First, in our study, the steepest drop out occurred between the 4<sup>th</sup> and 5<sup>th</sup> year after  
749 the index award, similar to the earlier cohort. Yet, the median number of years our unfunded ENI  
750 remained active was 5.4, and 55% of the unfunded ENI were still active by 5 years, suggesting, perhaps,  
751 a slight lengthening of survival time for the more recent cohort. Second, over  $\frac{3}{4}$  of our cohort (77%)  
752 remained active at least 5 years, compared to just 68% remaining after 5 years in the earlier cohort,



753 again suggesting survival time may be improving. Additional years of follow-up of our study cohort will  
754 be needed before more definitive conclusions about change in ENI survival time can be made.

755

756 While relationships between submission behaviors and funding success most likely seems intuitive, or  
757 even predictable, we are unaware of other studies that have reported on these relationships  
758 quantitatively. A more nuanced observation from our study is that successful ENI displayed remarkable  
759 within-person consistency, not only in grant submission behavior, but across multiple behaviors  
760 associated with a higher odds likelihood of future funding.

761

762 We looked at the strength of the independent variables in predicting ENI funding success both the  
763 univariate and multivariate analyses revealed that the strongest, statistically significant predictor  
764 variables were: a low percentage of the PI's applications triaged (QUALITY), frequent application  
765 submission by the PI (FREQUENCY), a low PI average application score (SCORE), submission of more  
766 renewal applications (RENEW) and more applications to different NIH ICs (REACH), a younger PI age at  
767 index award, and a high ENI-density index institution. Individually and collectively each of these factors  
768 conveyed 2- to 4-fold increases in the odds of an ENI being funded.

769

770 Finally, we used RFVI analysis to compute and rank all the predictor variables in terms of relative  
771 importance. Unlike the univariate and multivariate analyses, which identified and showed the impact of  
772 the predictor variables, the RFVI analysis revealed the order and relative importance of each one when  
773 all were included in the model. By far, the proportion of the PI's applications triaged was the most  
774 important predictor, followed by the PI's rate of application submission, application scores, and  
775 percentage of renewal applications. It is important to point out more effective grant writing and grant

776 submission behaviors confer a strong cumulative advantage for ENI, especially when they submit high  
777 quality applications.

778

## 779 **Conclusion**

780

781 Our study describes the characteristics of ENI from a NIAID cohort of first-time R01 investigators who  
782 were successful in obtaining new or renewal R01-e funding after their index award. They were  
783 successful despite a highly competitive funding environment that favored more senior investigators.  
784 Funded ENI began with a slightly better median index score than unfunded ENI (2.5 percentile points  
785 better), and an ability to write better applications (fewer were triaged) even while the cohort was still  
786 growing, and these characteristics may have conferred cumulative, lasting benefits to them. Clearly, the  
787 divergence between the two groups grew over time. When we compared grant submission behaviors  
788 and grant quality indices, what emerged was the profile of the tenacious, successful ENI, who developed  
789 superior grant writing skills, superior grant submission strategies, and projects with broad relevance and  
790 scope.

791

792 It should be noted that this study did not examine the potential role of the specific scientific areas that  
793 were pursued by the successful and unsuccessful ENI, and whether there were any differences or trends.  
794 Because the NIAID supports research across a broad range of scientific areas (basic immunology and  
795 microbiology, pathogenesis of infectious diseases, immune-mediated diseases and transplantation, as  
796 well as translational and clinical research in these areas), the cohort reflects the broad mandate of the  
797 Institute. That said, our data do indicate that PIs who had the ability to submit applications to more than  
798 one IC had an increased likelihood of being successful. This implies that sciences areas that are more

799 amenable to cross-cutting and trans-disciplinary research may confer an advantage to ENI working in  
800 these areas. Future work is needed to explore these possibilities.

801

802 Whether the characteristics displayed by the successful ENI were the results of better mentorship,  
803 institutional training resources, access to institutional core facilities, an innate ability to persevere, or all  
804 the above, is something about which we can only speculate. These factors are particularly important  
805 because several are obvious points of intervention by institutions and funding agencies.

806

807

## 808 **Acknowledgements**

809 We would like to thank Dr. Jason Liang of the Division of Clinical Research of the NIAID for his help with  
810 the regression and random forest statistical methods used in this manuscript. Dr. Liang wrote the  
811 original R code for these analyses and provided invaluable assistance in interpreting their results.

812

813

## 814 **Author Contributions**

815 **Conceptualization:** MJF PAH

816 **Data Curation:** PAH

817 **Formal analysis:** PAH

818 **Investigation:** PAH

819 **Methodology:** PAH

820 **Resources:** PAH

821 **Supervision:** MFJ

822 **Validation:** PAH MJF

823 **Visualization:** PAH MJF

824 **Writing** – original draft: PAH

825 **Writing – review & editing:** MJF PAH

826

827

## 828 **References**

829 1. Berg J. Imagining a sustainable biomedical enterprise. ASBMB Today. 2013 August.

830 Available from: [http://www.asbmb.org/asbmbtoday/asbmbtoday\\_article.aspx?id=48265](http://www.asbmb.org/asbmbtoday/asbmbtoday_article.aspx?id=48265)

831

832 2. Bourne HR. Point of view The writing on the wall Bourne. eLife. 2013; 2:e00642.

833 Available from: [http://rescuingbiomedicalresearch.org/wp-](http://rescuingbiomedicalresearch.org/wp-content/uploads/2015/04/elife00642.pdf)

834 [content/uploads/2015/04/elife00642.pdf](http://rescuingbiomedicalresearch.org/wp-content/uploads/2015/04/elife00642.pdf)

835

836 3. Daniels RJ. A generation at risk: Young investigators and the future of the biomedical

837 workforce. PNAS. 2015 January 13; 112(2):313-318. doi: 10.1073/pnas.1418761112

838

839 4. Pickett CL, Corb BW, Matthews CR, Sundquist WI, Berg JM. Toward a sustainable

840 biomedical research enterprise: finding consensus and implementing recommendations.

841 PNAS. 2015 September 1; 112 (35):10832–10836. doi.org/10.1073/pnas.1509901112

842

843 5. Powell K. Young, talented and fed-up: scientists tell their stories. Nature. 2016 October 27; 538,

844 446–449. doi:10.1038/538446a.

- 845
- 846 6. Alberts B, Kirschner MW, Tilghman S, Varmus H. Rescuing US biomedical research from  
847 its systemic flaws. PNAS. 2014 Apr 22;111(16):5773-7. doi: 10.1073/pnas.1404402111  
848
- 849 7. Teitelbaum M. Structural disequilibria in biomedical research. Science. 2008. 321: 644-5.  
850 doi:10.1126/science.1160272.
- 851
- 852 8. Rockey S, Collins F. One Nation in Support of Biomedical Research? 2013 September 24. Available  
853 from: <https://nexus.od.nih.gov/all/2013/09/24/one-nation-in-support-of-biomedical-research/>  
854
- 855 9. Berg J. The impact of the sequester: 1000 fewer funded investigators. ASBMB Today. 2014;13(3):2-4.  
856 Available from: <https://www.asbmb.org/asbmbtoday/201403/PresidentsMessage/>  
857
- 858 10. Polka J, Krukenberg K. Making science a desirable career. Science. 2014 December 12; Vol. 346,  
859 Issue 6215, pp. 1422. doi: 10.1126/science.346.6215.1422.
- 860
- 861 11. National Institutes of Health, Office of Extramural Research. Average Age and Degree of NIH R01-  
862 Equivalent First-Time Awardees Fiscal Years 1980-2016. 2016 March 24. Available from:  
863 [https://grants.nih.gov/grants/new\\_investigators/Age\\_Degree-First-Time-117-  
864 16\\_RFM\\_Ils\\_25march2016\\_DR-Approved.xlsx](https://grants.nih.gov/grants/new_investigators/Age_Degree-First-Time-117-16_RFM_Ils_25march2016_DR-Approved.xlsx)  
865
- 866 12. National Institutes of Health, Office of Extramural Research. Rockey S. Retention Rates for First-  
867 Time R01 Awardees. 2014 October 28. Available from:  
868 <https://nexus.od.nih.gov/all/2014/10/28/retention-of-first-time-r01-awardees/>

869

870 13. Department of Health and Human Services, National Institutes of Health. Privacy Act of 1974;  
871 Annual Publication of Systems of Records; Notice. Federal Register. 2002 September 26; Vol. 67, No.  
872 187, 67 FR 60741. 09-25-0036, Extramural Awards and Chartered Advisory Committees: IMPAC,  
873 HHS/NIH/OER and HHS/NIH/CMO. Available from:  
874 [https://www.federalregister.gov/documents/2002/09/26/02-23965/privacy-act-of-1974-annual-](https://www.federalregister.gov/documents/2002/09/26/02-23965/privacy-act-of-1974-annual-publication-of-systems-of-records)  
875 [publication-of-systems-of-records](https://www.federalregister.gov/documents/2002/09/26/02-23965/privacy-act-of-1974-annual-publication-of-systems-of-records)

876

877 14. National Institutes of Health, Office of Extramural Research. Collection of Personal Demographic  
878 Data. Available from: <https://grants.nih.gov/grants/collection-of-personal-demographic-data.htm>

879

880 15. National Institutes of Health, Office of Extramural Research. Types of Grant Programs. Available  
881 from: [https://grants.nih.gov/grants/funding/funding\\_program.htm](https://grants.nih.gov/grants/funding/funding_program.htm)

882

883 16. National Institutes of Health, Office of Extramural Research. Glossary of NIH Terms. R01 Equivalent  
884 Grant. Available from: <https://grants.nih.gov/grants/glossary.htm#R01EquivalentGrant>

885

886 17. National Institutes of Health, Office of Extramural Research. Lauer M. FY 2017 By the Numbers.  
887 2018 March 7. Available from: <https://nexus.od.nih.gov/all/2018/03/07/fy-2017-by-the-numbers/>

888

889 18. Congressional Research Service. Johnson J. NIH Funding: FY1994-FY2019. 2018 May 2. Available  
890 from: <https://fas.org/sgp/crs/misc/R43341.pdf>

891

- 892 19. National Institutes of Health, Office of Extramural Research. Early Stage and Early Established  
893 Investigator Policies. Available from: <https://grants.nih.gov/policy/early-investigators/index.htm>  
894
- 895 20. National Institutes of Health, Office of Extramural Research. Rockey S. Paylines, Percentiles and  
896 Success Rates. 2011 February 15. Available from:  
897 <https://nexus.od.nih.gov/all/2011/02/15/paylines-percentiles-success-rates/>  
898
- 899 21. National Institutes of Health, Office of Extramural Research. Peer Review Process & Changes.  
900 Available from: <https://enhancing-peer-review.nih.gov/process&changes.html>  
901
- 902 22. Breiman L. Machine Learning. 2001. 45:5. doi: 10.1023/A:1010933404324  
903
- 904 23. Doyle J, Quinn K, Bodenstein Y, Wu C, Danthi N, Lauer M. Association of percentile ranking with  
905 citation impact and productivity in a large cohort of *de novo* NIMH-funded R01 grants. *Molecular*  
906 *Psychiatry*. 2015;20(9):1030-1036. doi:10.1038/mp.2015.71.  
907
- 908 24. Kaltman JR, Evans FJ, Danthi NS, Wu CO, DiMichele DM, Lauer MS. Prior publication productivity,  
909 grant percentile ranking, and topic-normalized citation impact of NHLBI cardiovascular R01 grants.  
910 *Circ Res*. 2014 Sep 12;115(7):617-24. doi: 10.1161/CIRCRESAHA.115.304766.  
911
- 912 25. Casanova R, Saldana S, Chew EY, Danis RP, Greven CM, Ambrosius WT. Application of Random  
913 Forests Methods to Diabetic Retinopathy Classification Analyses. *PLoS ONE*. 2014; 9(6): e98587.  
914 doi:10.1371/journal.pone.0098587  
915

- 916 26. Díaz-Uriarte R, Alvarez de Andrés S. Gene selection and classification of microarray data using  
917 random forest. BMC Bioinformatics. 2006 January 6; 7:3. doi: 10.1186/1471-2105-7-3  
918
- 919 27. Bhadra P, Yan J, Li J, Siu SWI. AmPEP: Sequence-based prediction of antimicrobial  
920 peptides using distribution patterns of amino acid properties and random forest. 2018  
921 January 26;8(1)1697. doi: 10.1038/s41598-018-19752-w  
922
- 923 28. Landgraf A. Random Forest Variable Importance. 2012 July 19. In: R-bloggers. Available  
924 from: <https://www.r-bloggers.com/random-forest-variable-importance/>  
925
- 926 29. Strobl C, Boulesteix AL, Zeileis A, Hothorn T. Bias in random forest variable importance measures:  
927 Illustrations, sources and a solution. BMC Bioinformatics. 2007 January 25; 8:25. doi: 10.1186/1471-  
928 2105-8-25  
929
- 930 30. R Core Team. R: A language and environment for statistical computing. R Foundation for Statistical  
931 Computing, Vienna, Austria. 2017. Available from: <https://www.r-project.org/>  
932
- 933 31. Wickham H. The Split-Apply-Combine Strategy for Data Analysis. Journal of Statistical Software.  
934 2011; 40(1), 1-29. Available from: <http://www.jstatsoft.org/v40/i01/>  
935
- 936 32. Wickham H, Francois R, Henry L, Müller Muller K. dplyr: A Grammar of Data Manipulation. R  
937 package version 0.7.4. 2017. Available from: <https://CRAN.R-project.org/package=dplyr>  
938



- 939 33. Wickham H. *ggplot2: Elegant Graphics for Data Analysis*. Springer-Verlag New York. 2009. Available  
940 from:<http://ggplot2.org>  
941
- 942 34. Wickham H, Bryan J. *readxl: Read Excel Files*. R package version 1.0.0. 2017. Available from:  
943 <https://CRAN.R-project.org/package=readxl>  
944
- 945 35. Zeileis A, Hothorn T. Diagnostic Checking in Regression Relationships. *R News*. 2002;2(3), 7-10.  
946 Available from: <https://CRAN.R-project.org/doc/Rnews/>  
947
- 948 36. Liaw R, Wiener M. *randomForest: Breiman and Cutler's Random Forests for Classification and*  
949 *Regression*. Fortran original by Leo Breiman and Adele Cutler. 2018 March 25. Available from:  
950 <https://CRAN.R-project.org/package=randomForest>  
951
- 952 37. National Institutes of Health. *Biomedical Research Workforce Working Group Report*. A Working  
953 Group of the Advisory Committee to the Director. 2012 June 14. Available from:  
954 [http://acd.od.nih.gov/documents/reports/Biomedical\\_research\\_wgreport.pdf](http://acd.od.nih.gov/documents/reports/Biomedical_research_wgreport.pdf)  
955
- 956 38. National Institutes of Health. *Research Portfolio Online Reporting Tools (RePORT)*. NIH Data Book.  
957 Available from: <https://report.nih.gov/nihdatabook/index.aspx?catid=8>  
958
- 959 39. National Institutes of Health. *Research Portfolio Online Reporting Tools (RePORT)*. Physician-  
960 Scientist Workforce (PSW) Report 2014. Appendix IV: Physician-scientists Workforce Data, A5-2.  
961 Available from: [https://report.nih.gov/Workforce/PSW/appendix\\_iv\\_a5\\_2.aspx](https://report.nih.gov/Workforce/PSW/appendix_iv_a5_2.aspx)  
962

- 963 40. National Institutes of Health, Office of Extramural Research. Rockey S. Looking to the Future of the  
964 Biomedical Workforce. 2011 January 31. Available from:  
965 <https://nexus.od.nih.gov/all/2011/01/31/future-biomedical-workforce/>  
966
- 967 41. National Institutes of Health. Research Portfolio Online Reporting Tools (RePORT). NIH Awards by  
968 Location and Organization. Available from: <https://report.nih.gov/award/index.cfm>  
969
- 970 42. National Institute of Allergy and Infectious Diseases. Archive of Final NIAID Paylines by  
971 Fiscal Year. Available from: [https://www.niaid.nih.gov/grants-contracts/archive-](https://www.niaid.nih.gov/grants-contracts/archive-paylines-fiscal-year)  
972 [paylines-fiscal-year](https://www.niaid.nih.gov/grants-contracts/archive-paylines-fiscal-year)  
973
- 974 43. National Institute of Allergy and Infectious Diseases. NIAID Uses Selective Pay, Bridge Awards to  
975 Complement Top-Scoring Applications. Funding News. 2016 March 23. Available from:  
976 [https://www.niaid.nih.gov/grants-contracts/selective-pay-bridge-awards-complement-top-](https://www.niaid.nih.gov/grants-contracts/selective-pay-bridge-awards-complement-top-applications)  
977 [applications](https://www.niaid.nih.gov/grants-contracts/selective-pay-bridge-awards-complement-top-applications)  
978
- 979 44. National Institutes of Health. Collins, F. Launching the Next Generation Researchers  
980 Initiative to Strengthen the Biomedical Research Enterprise. The NIH Director. 2017 June  
981 8. Available from: [https://www.nih.gov/about-nih/who-we-are/nih-](https://www.nih.gov/about-nih/who-we-are/nih-director/statements/launching-next-generation-researchers-initiative-strengthen-biomedical-research-enterprise)  
982 [director/statements/launching-next-generation-researchers-initiative-strengthen-](https://www.nih.gov/about-nih/who-we-are/nih-director/statements/launching-next-generation-researchers-initiative-strengthen-biomedical-research-enterprise)  
983 [biomedical-research-enterprise](https://www.nih.gov/about-nih/who-we-are/nih-director/statements/launching-next-generation-researchers-initiative-strengthen-biomedical-research-enterprise)  
984
- 985 45. Bourne HR. A recipe for mediocrity and disaster, in five axioms. *elife*. 2013 Jul 16;2:e01138. doi:  
986 10.7554/eLife.01138.

987

988 46. National Institute of General Medical Sciences. Lorsch JR. A Shared Responsibility. 2015 January 5.

989 Available from: <https://loop.nigms.nih.gov/2015/01/a-shared-responsibility/>

990

991 47. Kimble J, Bement WM, Qiang C, Cox BL, Drinkwater NR, Gourse RL, et al. Strategies from UW-

992 Madison for Rescuing Biomedical Research in the US. eLife. 2015 June 30;4:e09305.

993 doi:10.7554/eLife.09305.

994

995 48. National Research Council . Research Universities and the Future of America: Ten Breakthrough

996 Actions Vital to Our Nation's Prosperity and Security. 2012. National Academies Press, Washington,

997 DC.

998

999 49. Federation of American Societies for Experimental Biology. Sustaining Discovery in Biological and

1000 Medical Sciences: A Framework for Discussion. 2015. Available from:

1001 <http://www.fasebj.org/doi/pdf/10.1096/fj.14-264358>

1002

1003 50. Hudson K, Collins F. The 21st Century Cures Act — A View from the NIH. NEJM. 2017 January

1004 12;376:111-113. doi: doi/full/10.1056/NEJMp1615745

1005

1006 51. Levitt, Michael, and Jonathan M. Levitt. Future of Fundamental Discovery in US Biomedical

1007 Research. PNAS. 2017 June 5. 201609996. doi: 10.1073/pnas.1609996114

1008

1009 52. Charette MF, Oh YS, Maric-Bilkan C, Scott LL, Wu CC, Eblen M, et al. Shifting Demographics among

1010 Research Project Grant Awardees at the National Heart, Lung, and Blood Institute (NHLBI). PloS

- 1011 ONE. 2016 December 15;11(12). doi: 10.1371/journal.pone.0168511
- 1012
- 1013 53. Germain, R. Healing the NIH-Funded Biomedical Research Enterprise. Cell. 2015 June
- 1014 18;161(7):1485-1491. doi: 10.1016/j.cell.2015.05.052
- 1015
- 1016 54. Ioannidis JP. More time for research: fund people not projects. Nature. 2011 September
- 1017 28;477(7366):529-31. doi: 10.1038/477529a.
- 1018
- 1019 55. Alberts B. Limits to growth: in biology, small science is good science. Cell. 1985 June;
- 1020 41(2):337-338. doi: 10.1016/S0092-8674(85)80001-5
- 1021
- 1022 56. Fortin, Jean-Michel Fortin, David J. Currie Big Science vs. Little Science: How Scientific Impact
- 1023 Scales with Funding. PLoS ONE. 2013 June 19. doi: 10.1371/journal.pone.0065263
- 1024
- 1025 57. National Institutes of Health, Office of Extramural Research. Rockey S. Comparing Success Rates,
- 1026 Award Rates, and Funding Rates. 2014 March 5. Available from:
- 1027 <https://nexus.od.nih.gov/all/2014/03/05/comparing-success-award-funding-rates/>
- 1028
- 1029 58. National Institutes of Health. Research Portfolio Online Reporting Tools (RePORT). NIH Data Book.
- 1030 R01-Equivalent grants: Applications, awards, and success rates. Available from:
- 1031 <https://report.nih.gov/NIHDatabook/Charts/Default.aspx?showm=Y&chartId=29&catId=2>
- 1032

- 1033 59. National Institutes of Health, Office of Extramural Research. Rockey S. More Applications; Many  
1034 More Applicants. 2012 August 9. Available from: [https://nexus.od.nih.gov/all/2012/08/09/more-](https://nexus.od.nih.gov/all/2012/08/09/more-applications-many-more-applicants/)  
1035 [applications-many-more-applicants/](https://nexus.od.nih.gov/all/2012/08/09/more-applications-many-more-applicants/)  
1036
- 1037 60. National Institutes of Health, Office of Extramural Research. A History of New and Early Stage  
1038 Investigator Policies and Data. Available from: [https://grants.nih.gov/policy/early-](https://grants.nih.gov/policy/early-investigators/history.htm)  
1039 [investigators/history.htm](https://grants.nih.gov/policy/early-investigators/history.htm)  
1040
- 1041 61. National Institutes of Health, Office of Extramural Research. Rockey S. Does Your Degree Matter?  
1042 2012 April 27. Available from: <https://nexus.od.nih.gov/all/2012/04/27/does-your-degree-matter/>  
1043
- 1044 62. National Institutes of Health, Office of Extramural Research. Rockey S. Does Your Institution Matter?  
1045 2012 May 14. Available from: [https://nexus.od.nih.gov/all/2012/05/14/does-your-institution-](https://nexus.od.nih.gov/all/2012/05/14/does-your-institution-matter)  
1046 [matter](https://nexus.od.nih.gov/all/2012/05/14/does-your-institution-matter)  
1047
- 1048 63. National Institutes of Health, Office of Extramural Research. Rockey S. A Look at Funding Rates of  
1049 PhDs at Different Institution Types. 2012 May 25. Available from:  
1050 [https://nexus.od.nih.gov/all/2012/05/25/a-look-at-funding-rates-of-phds-at-different-institution-](https://nexus.od.nih.gov/all/2012/05/25/a-look-at-funding-rates-of-phds-at-different-institution-types/)  
1051 [types/](https://nexus.od.nih.gov/all/2012/05/25/a-look-at-funding-rates-of-phds-at-different-institution-types/)  
1052
- 1053 64. Ginther DK, et al. Race, ethnicity, and NIH research awards. *Science*. 2011;333(6045):1015-1019.  
1054

1055 65. National Institutes of Health, Office of Extramural Research. Lauer, M. Are Attempts at Renewal

1056 Successful? 2016 February 16. Available from: <https://nexus.od.nih.gov/all/2016/02/16/are->

1057 [attempts-at-renewal-successful/](https://nexus.od.nih.gov/all/2016/02/16/are-attempts-at-renewal-successful/)

1058

1059 66. National Institute of General Medical Sciences. Maas S. Examining the First Competing Renewal

1060 Rates of New NIGMS Investigators. 2015 February 13. Available from:

1061 <https://loop.nigms.nih.gov/2015/02/examining-the-first-competing-renewal-rates-of-new-nigms->

1062 [investigators/](https://loop.nigms.nih.gov/2015/02/examining-the-first-competing-renewal-rates-of-new-nigms-investigators/)

1063

## 1064 **Supporting information**

1065 **S1 Appendix. Details of cohort selection and identification of project start dates in IMPAC II**

1066 **S1 Table. Mean Number of Years ENI ACTIVE Applying for NIH Grants**

1067 **S1 Fig. Frequency of application submission by PI age at time of submission**

1068 **S2a Fig. ENI Average Application ANNUAL Scores, 2012**

1069 **S2b Fig. ENI Average Application ANNUAL Scores and Cumulative Numbers of ENI, FY 2012**

1070 **S2 Table. ENI Funding Success According to Index Award Score Above or Below NI Payline**

1071 **S3 Table. Multivariate Logistic Regression Model, Predictive Strength of Independent Variables on the**

1072 **Odds of ENI Funding Success**

1073

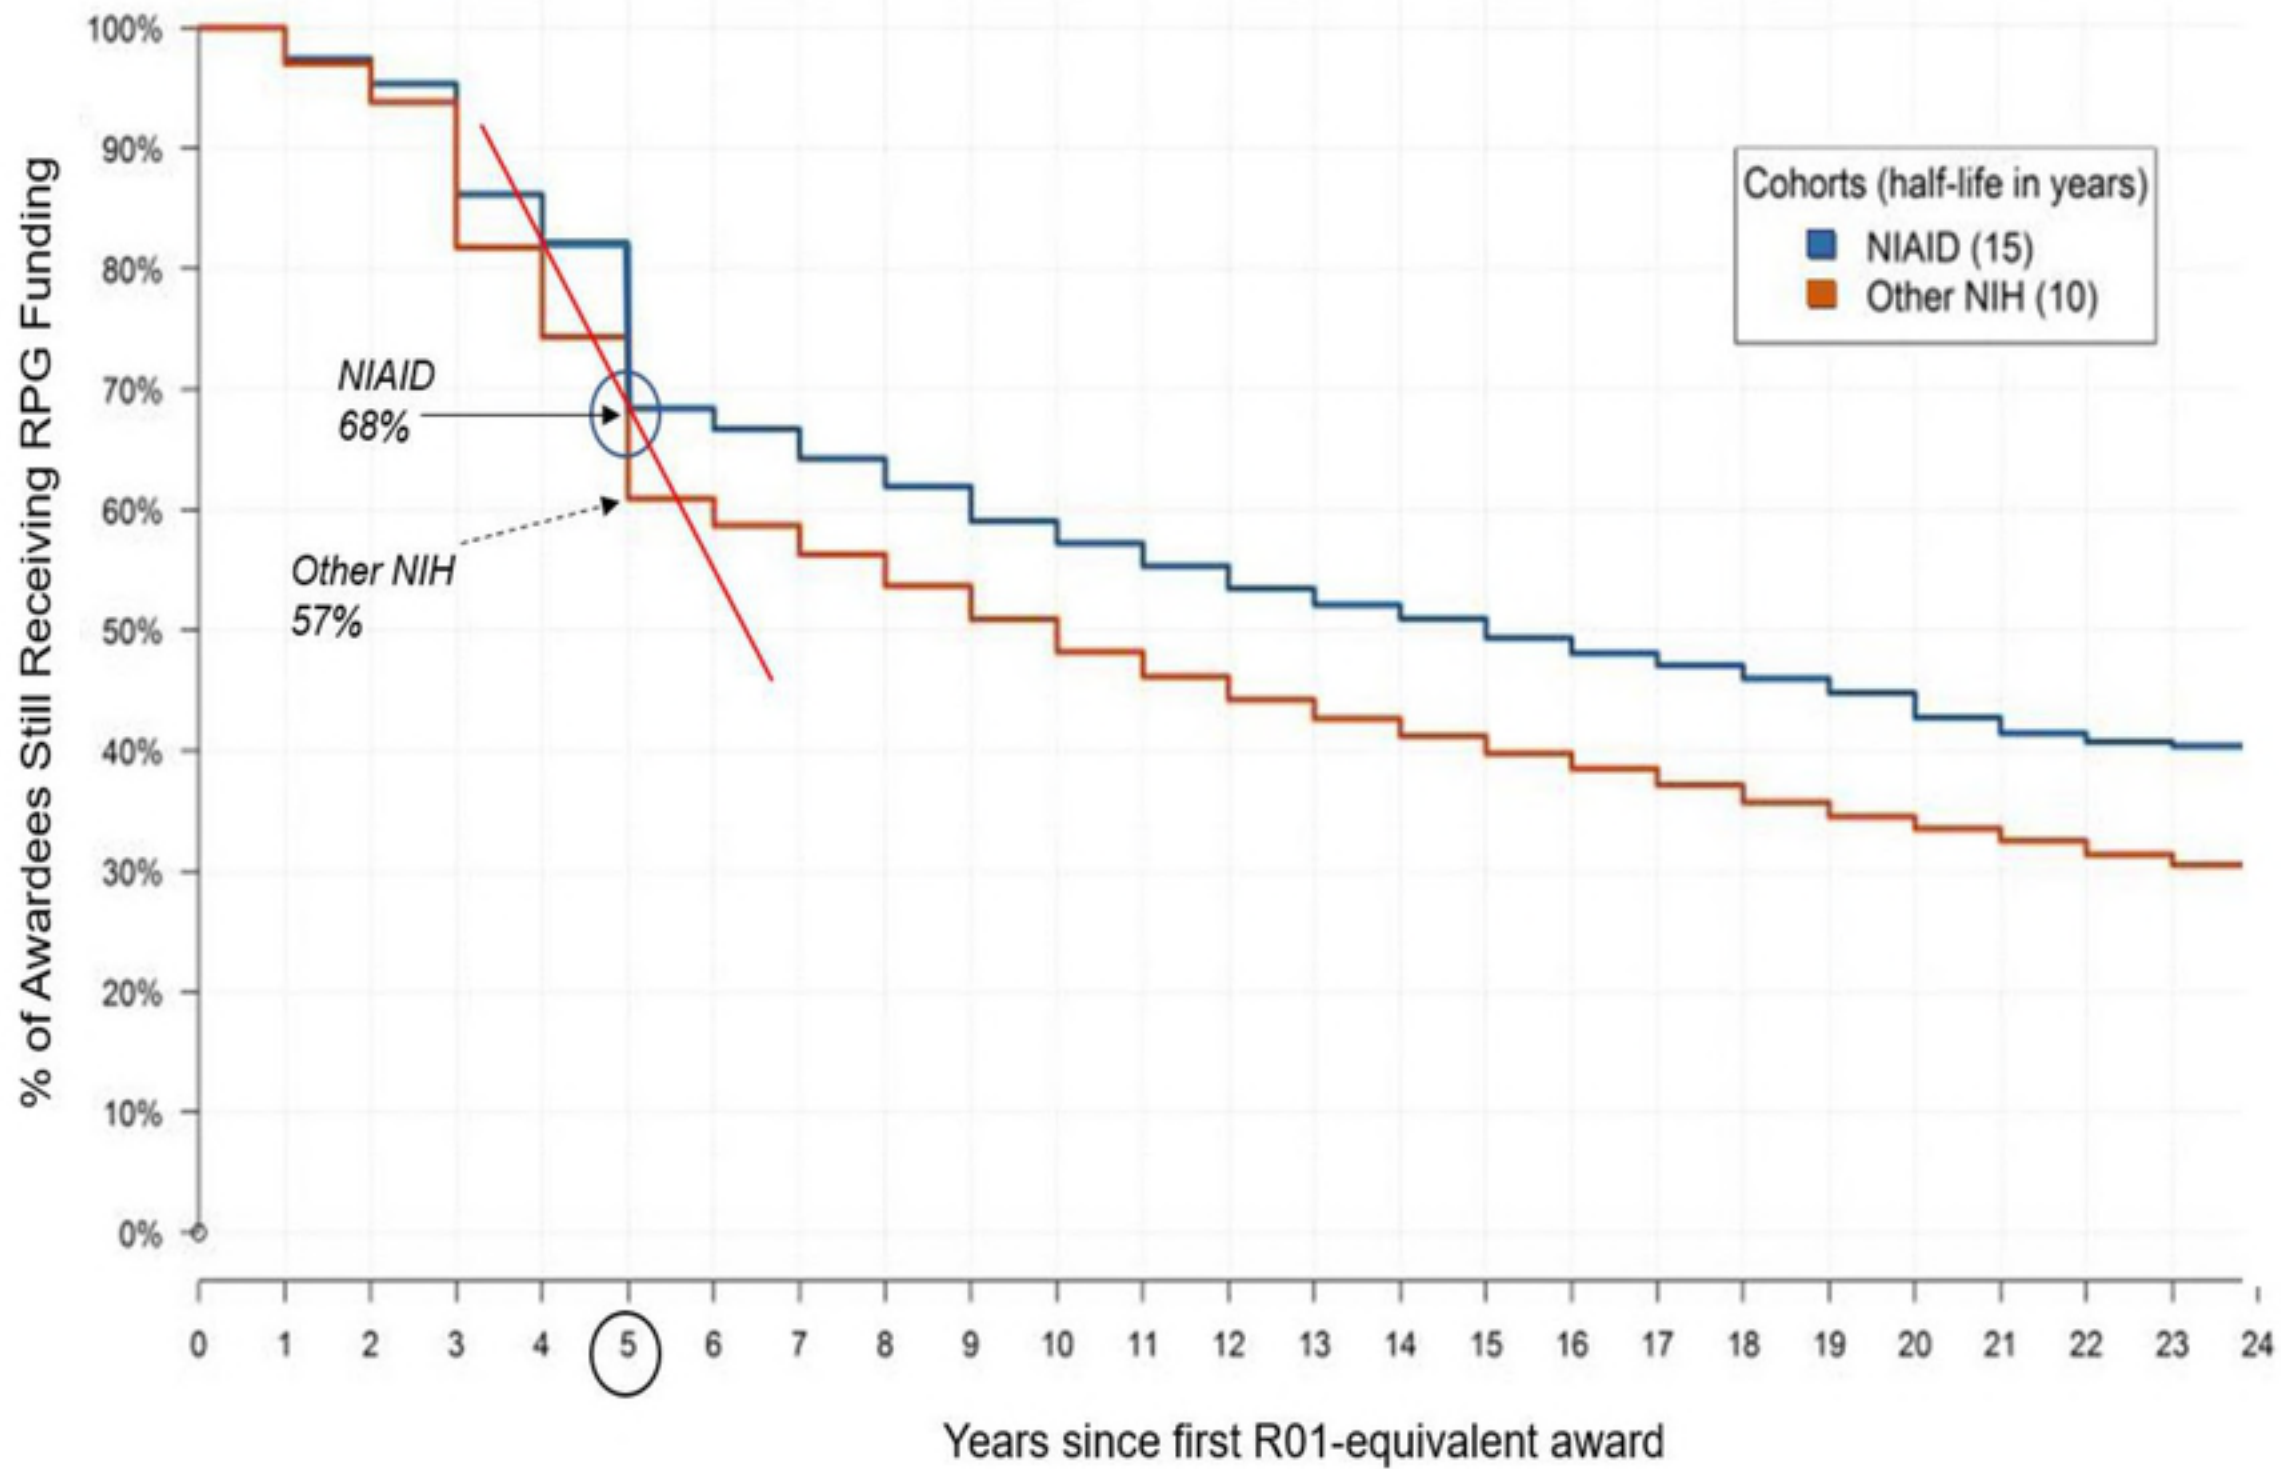

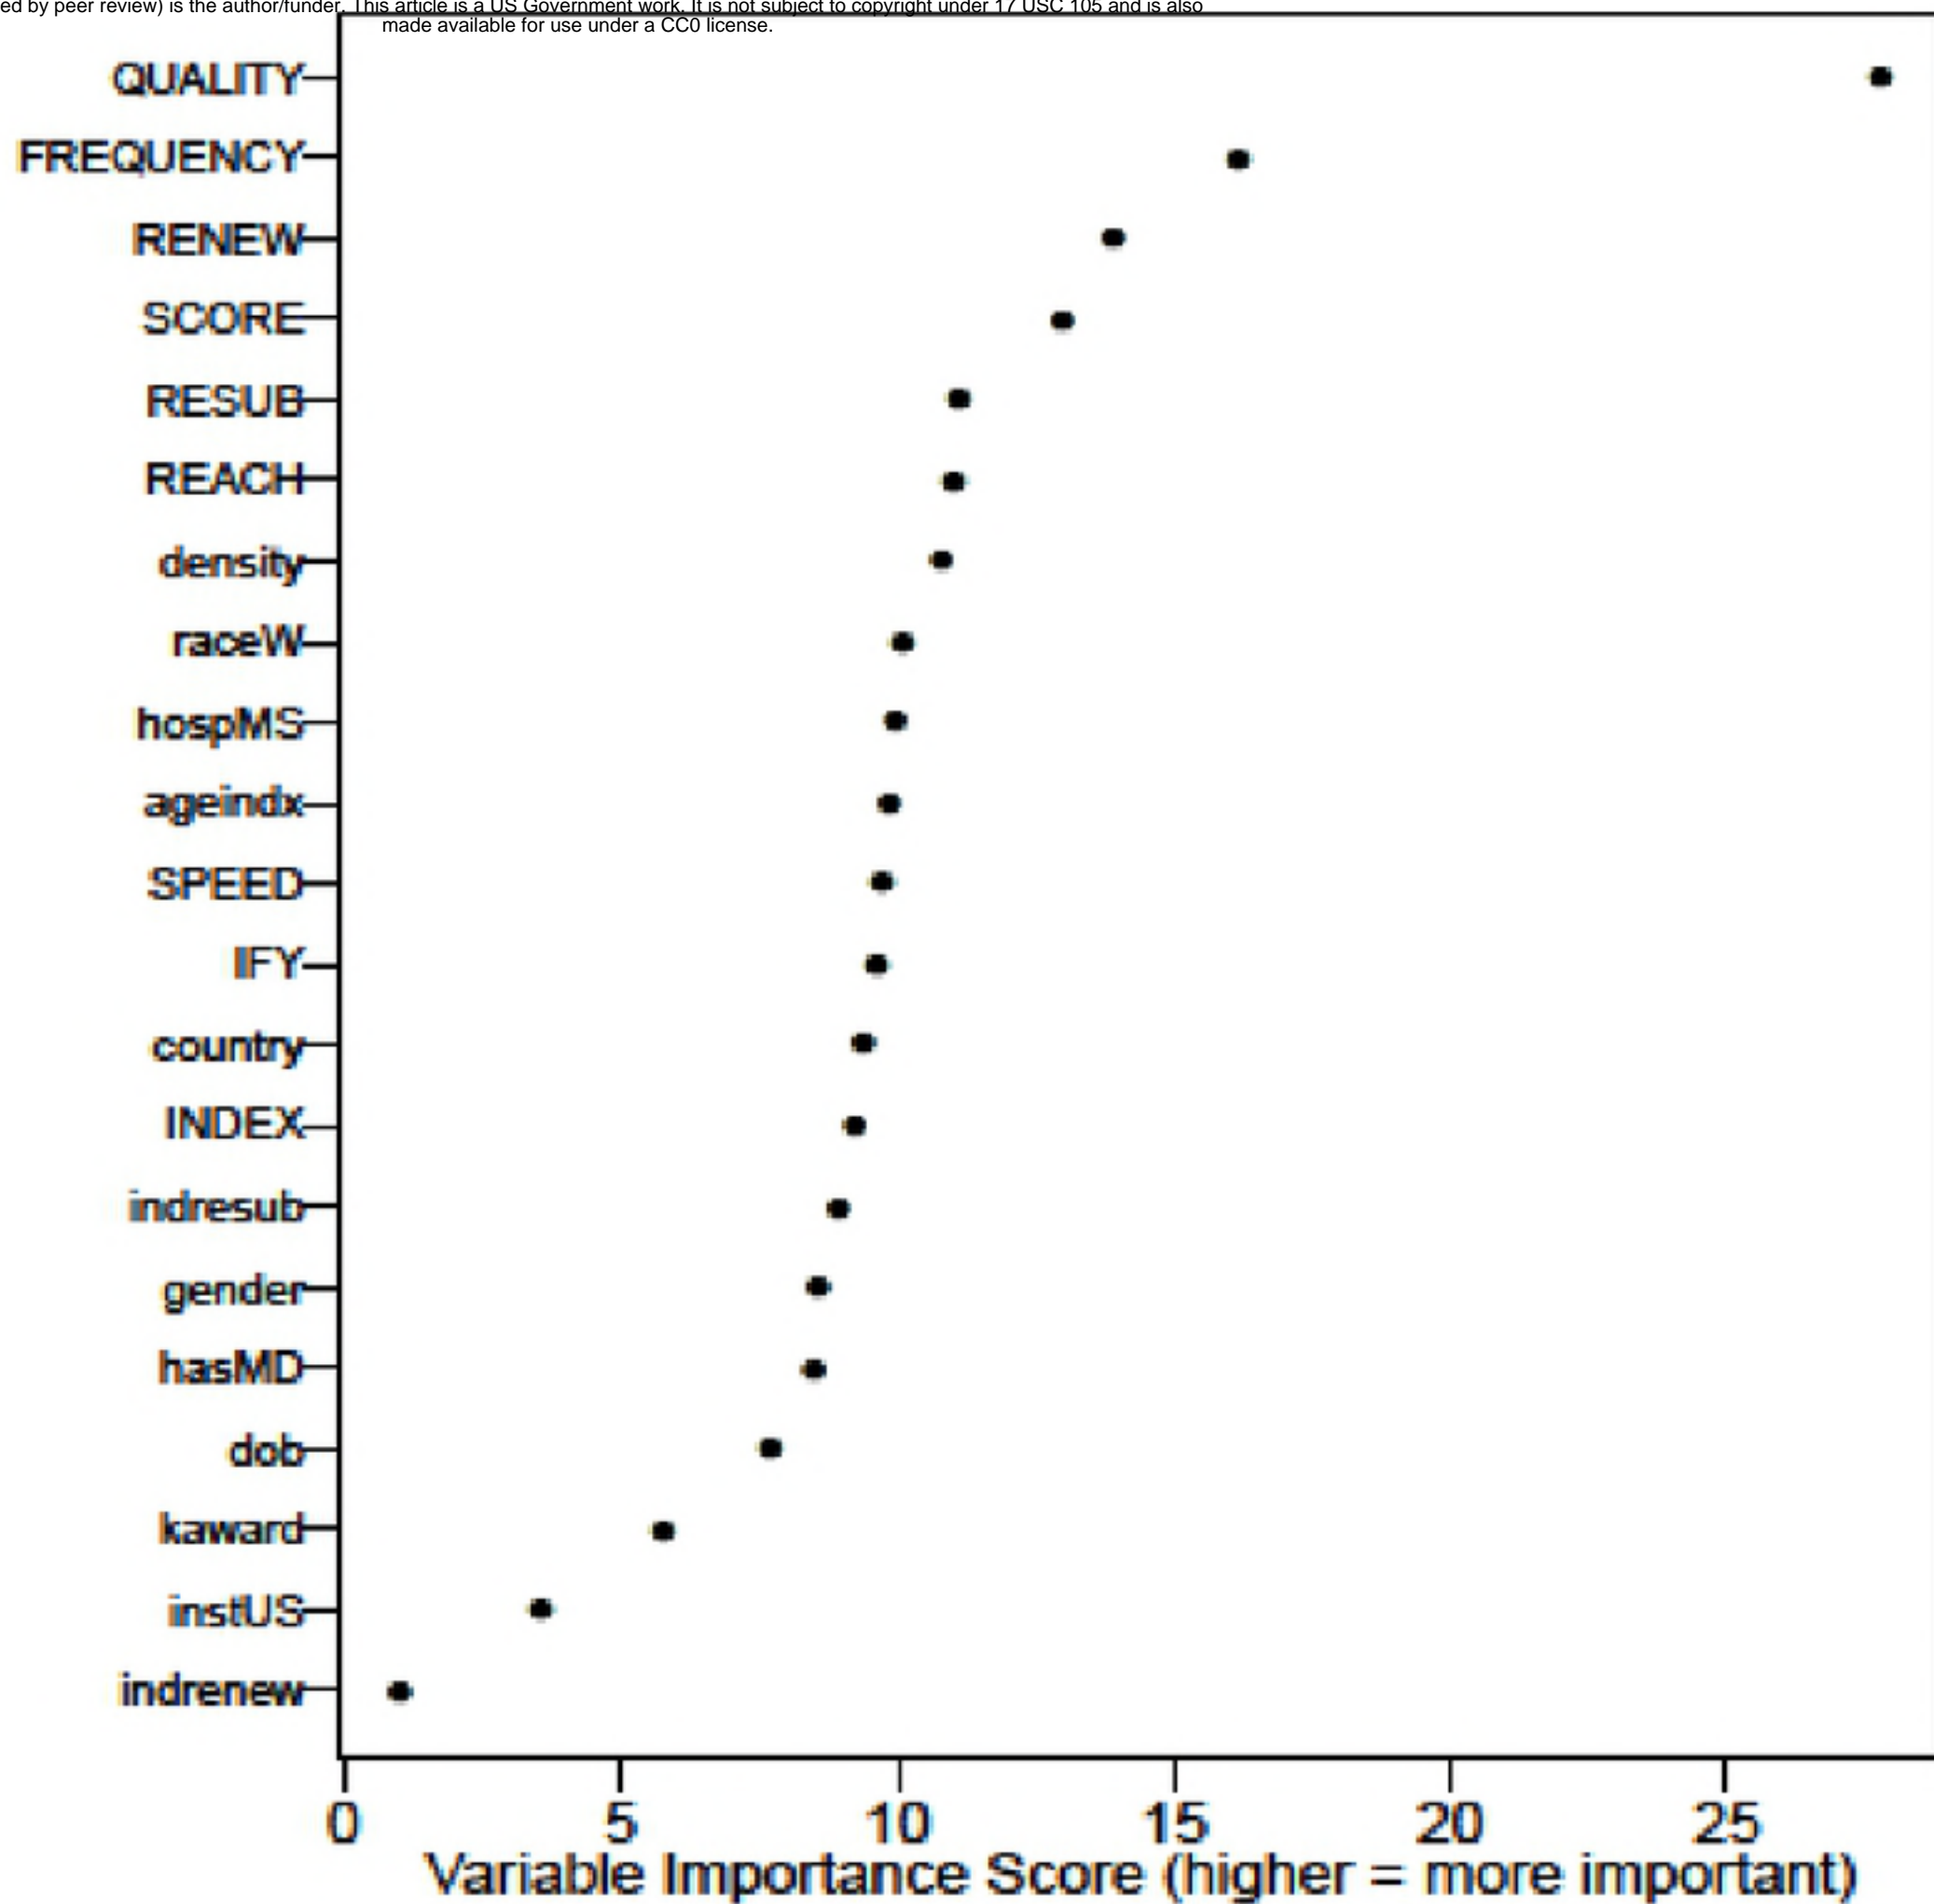



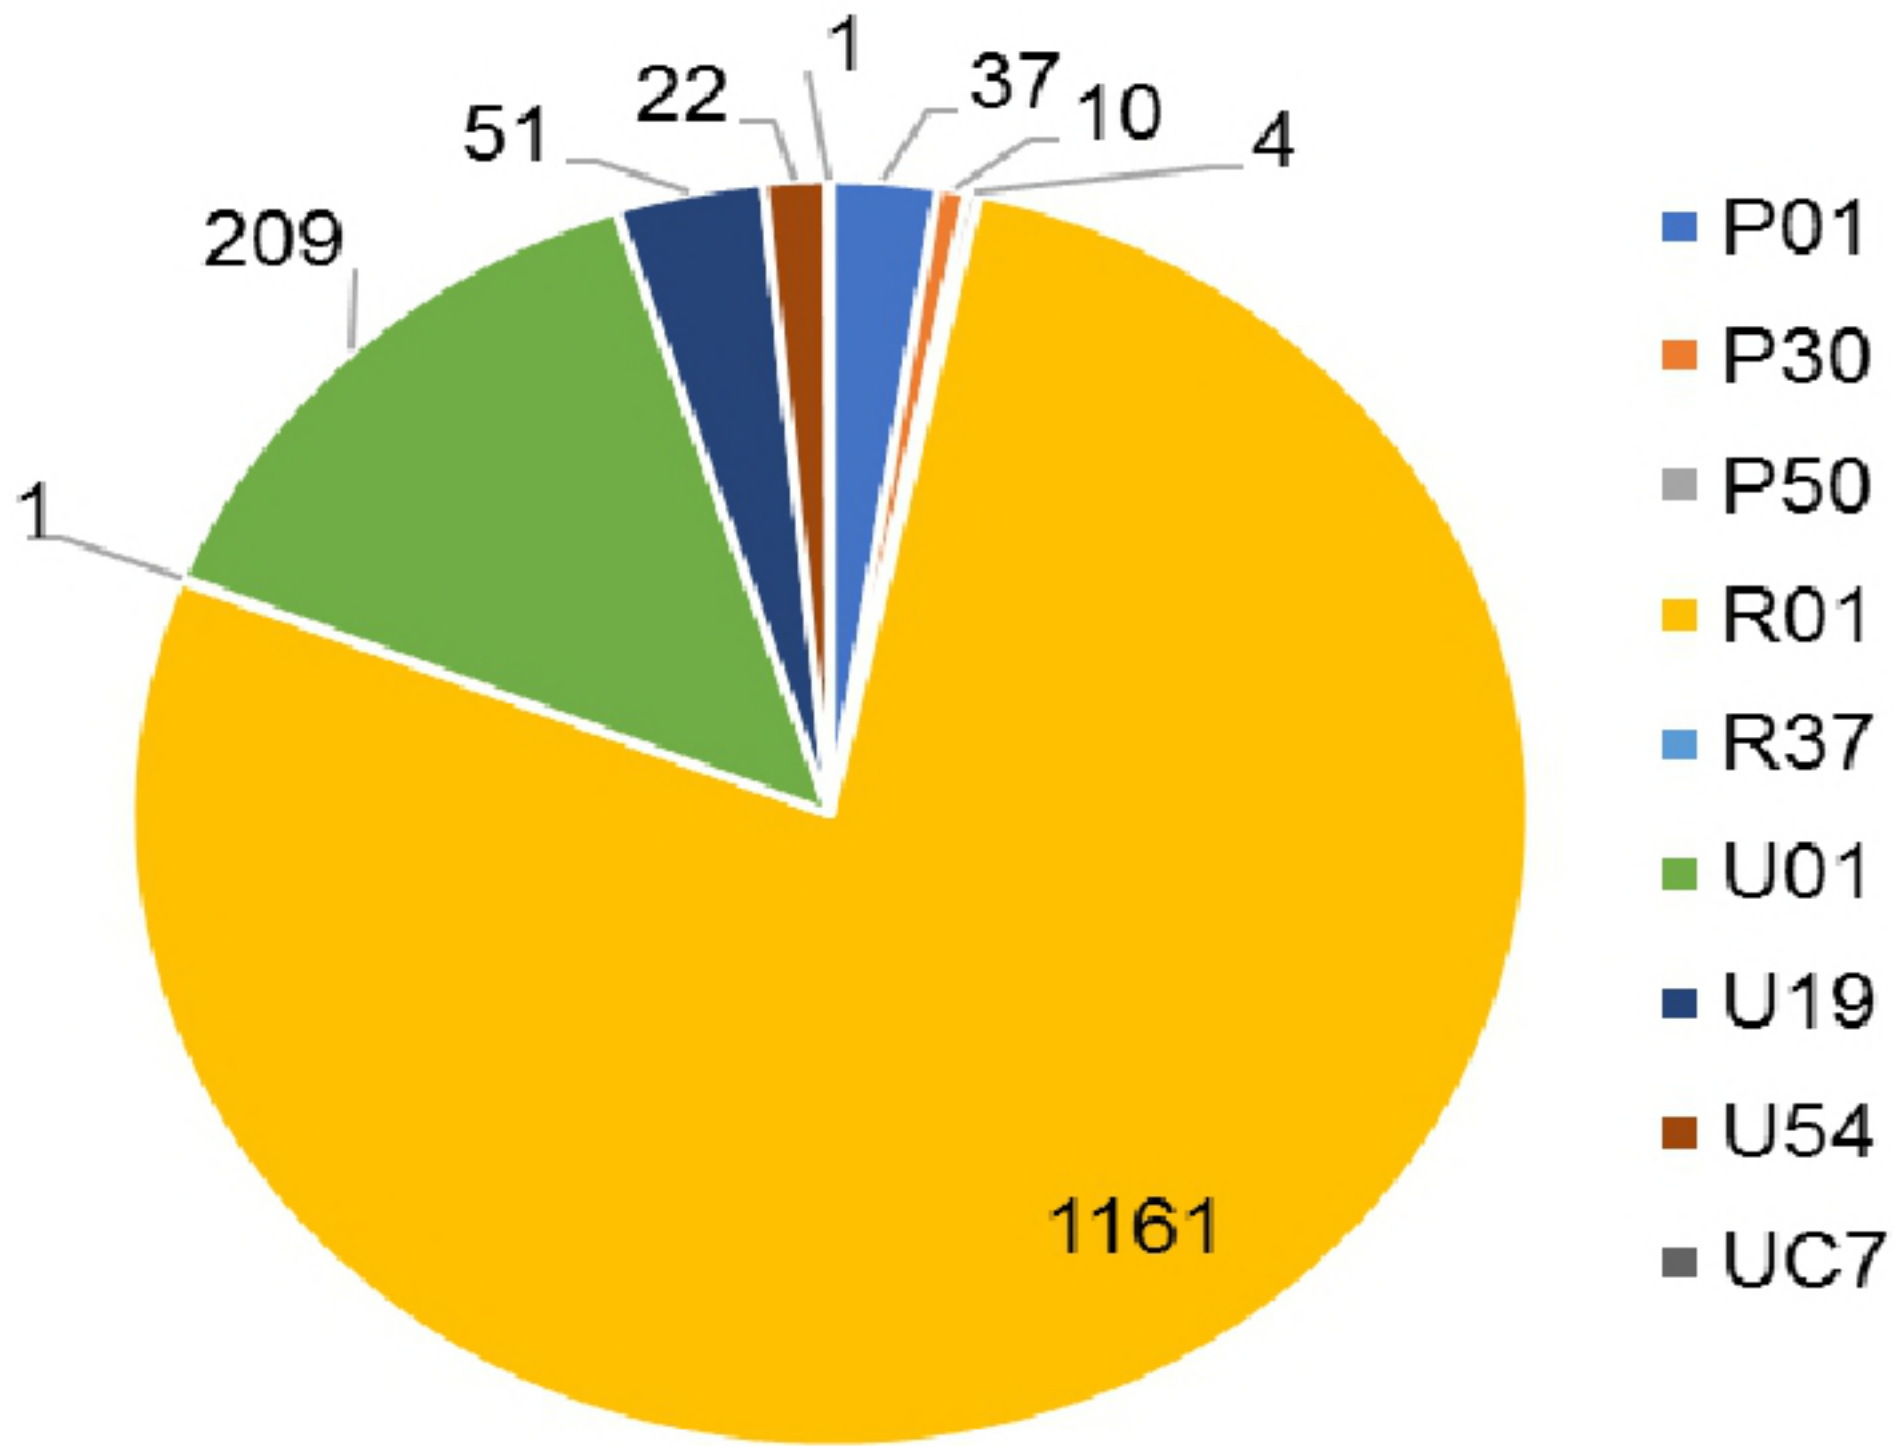

Institution ENI Density Tertile

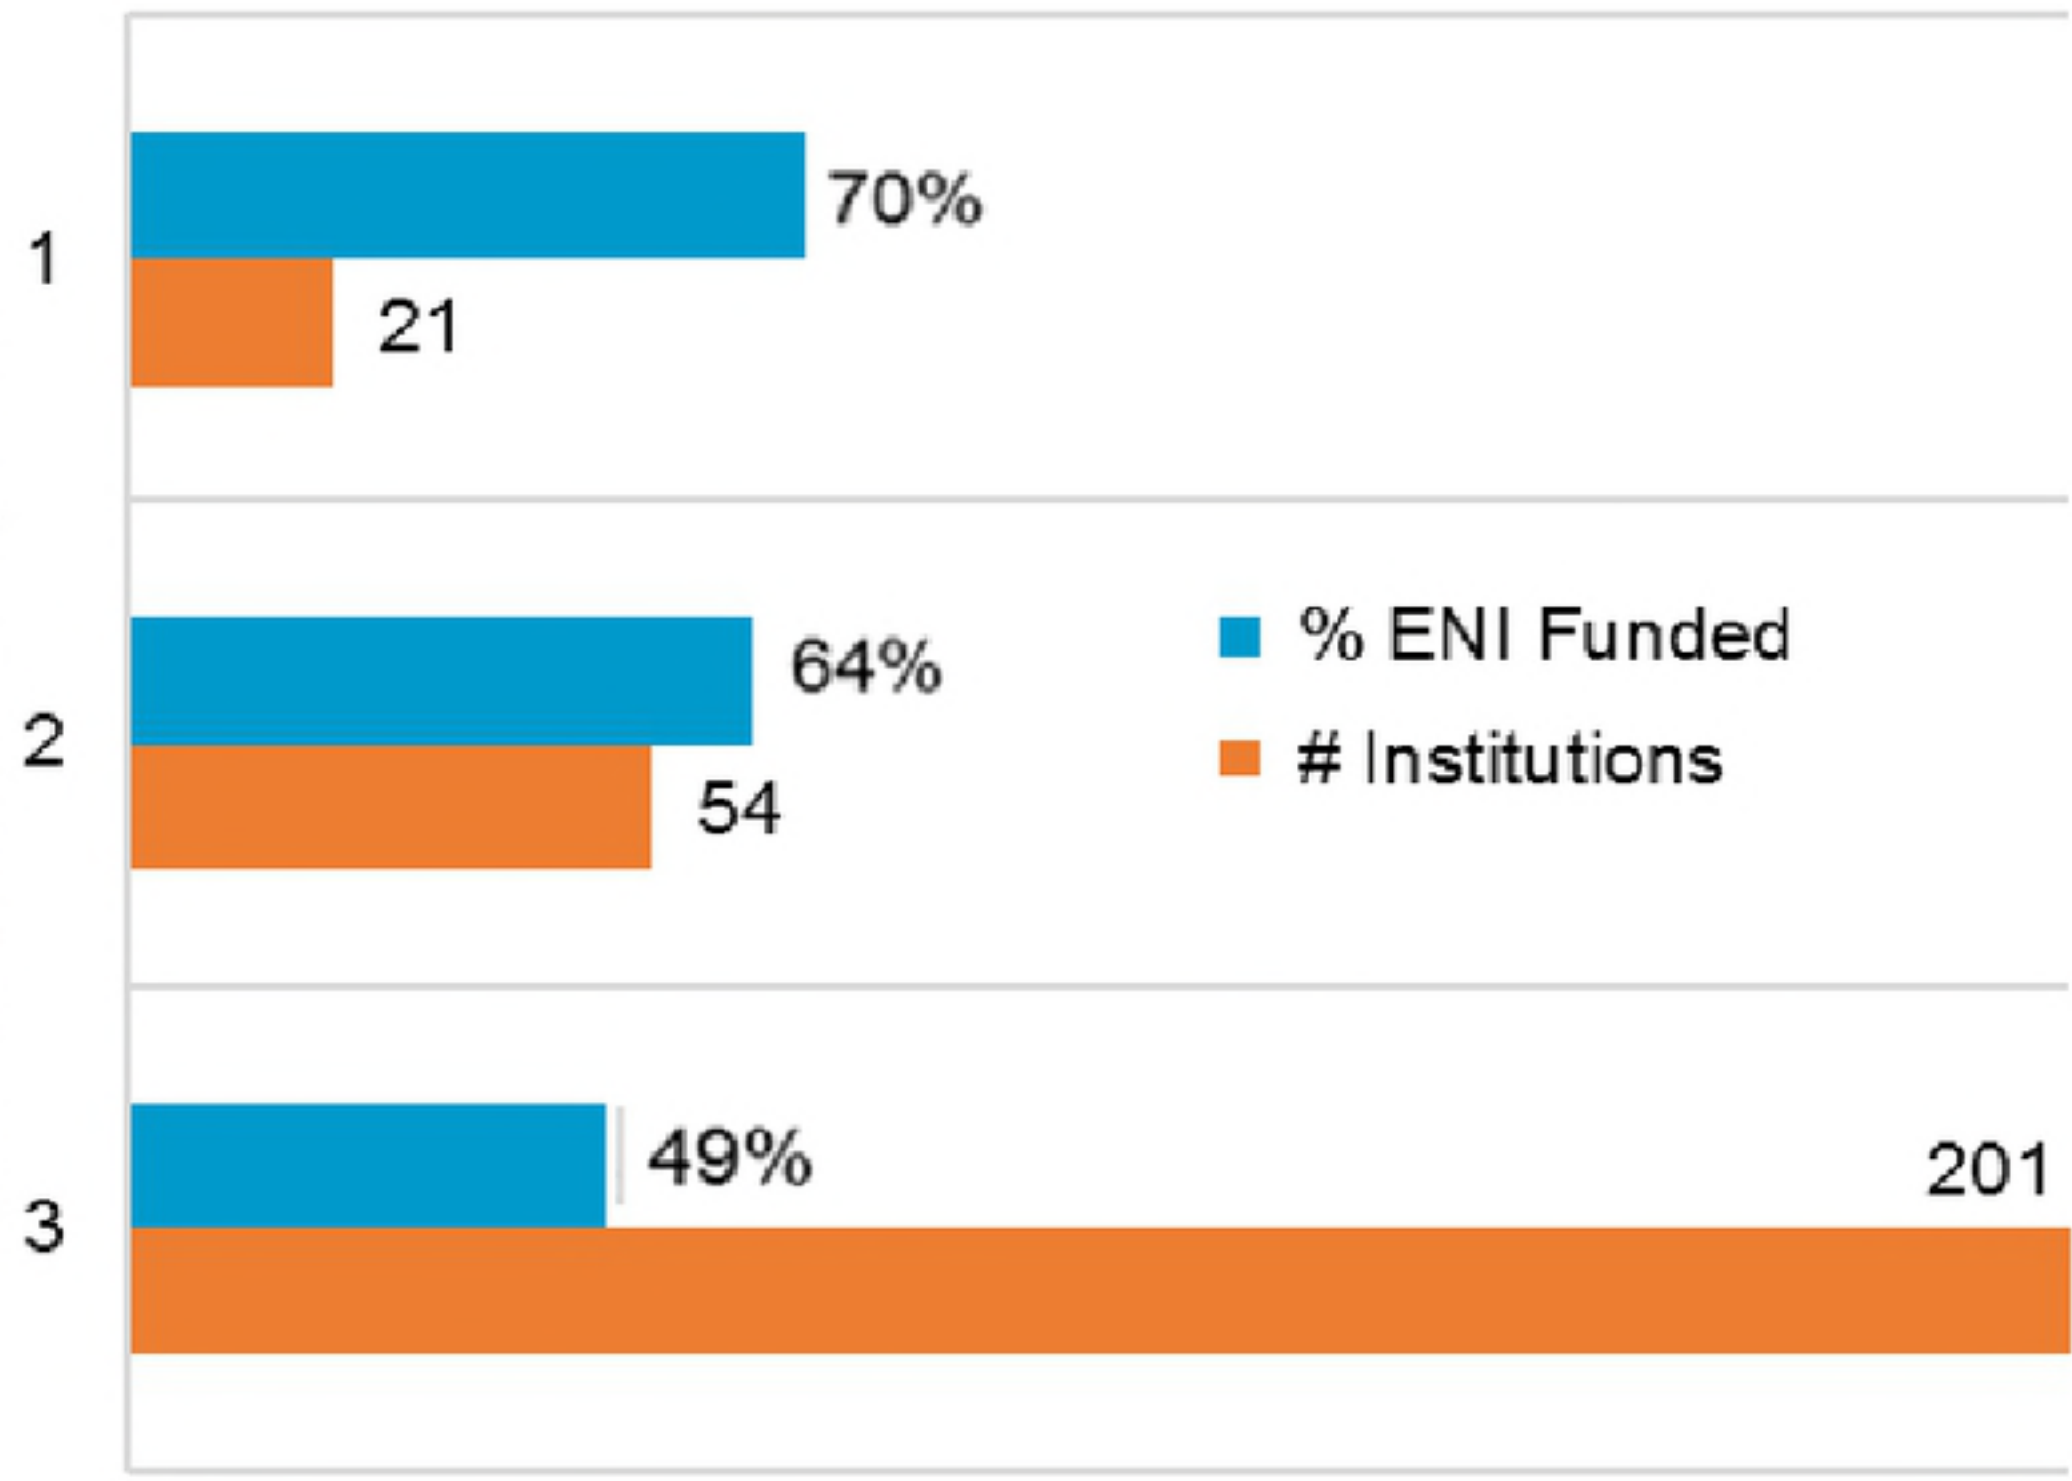

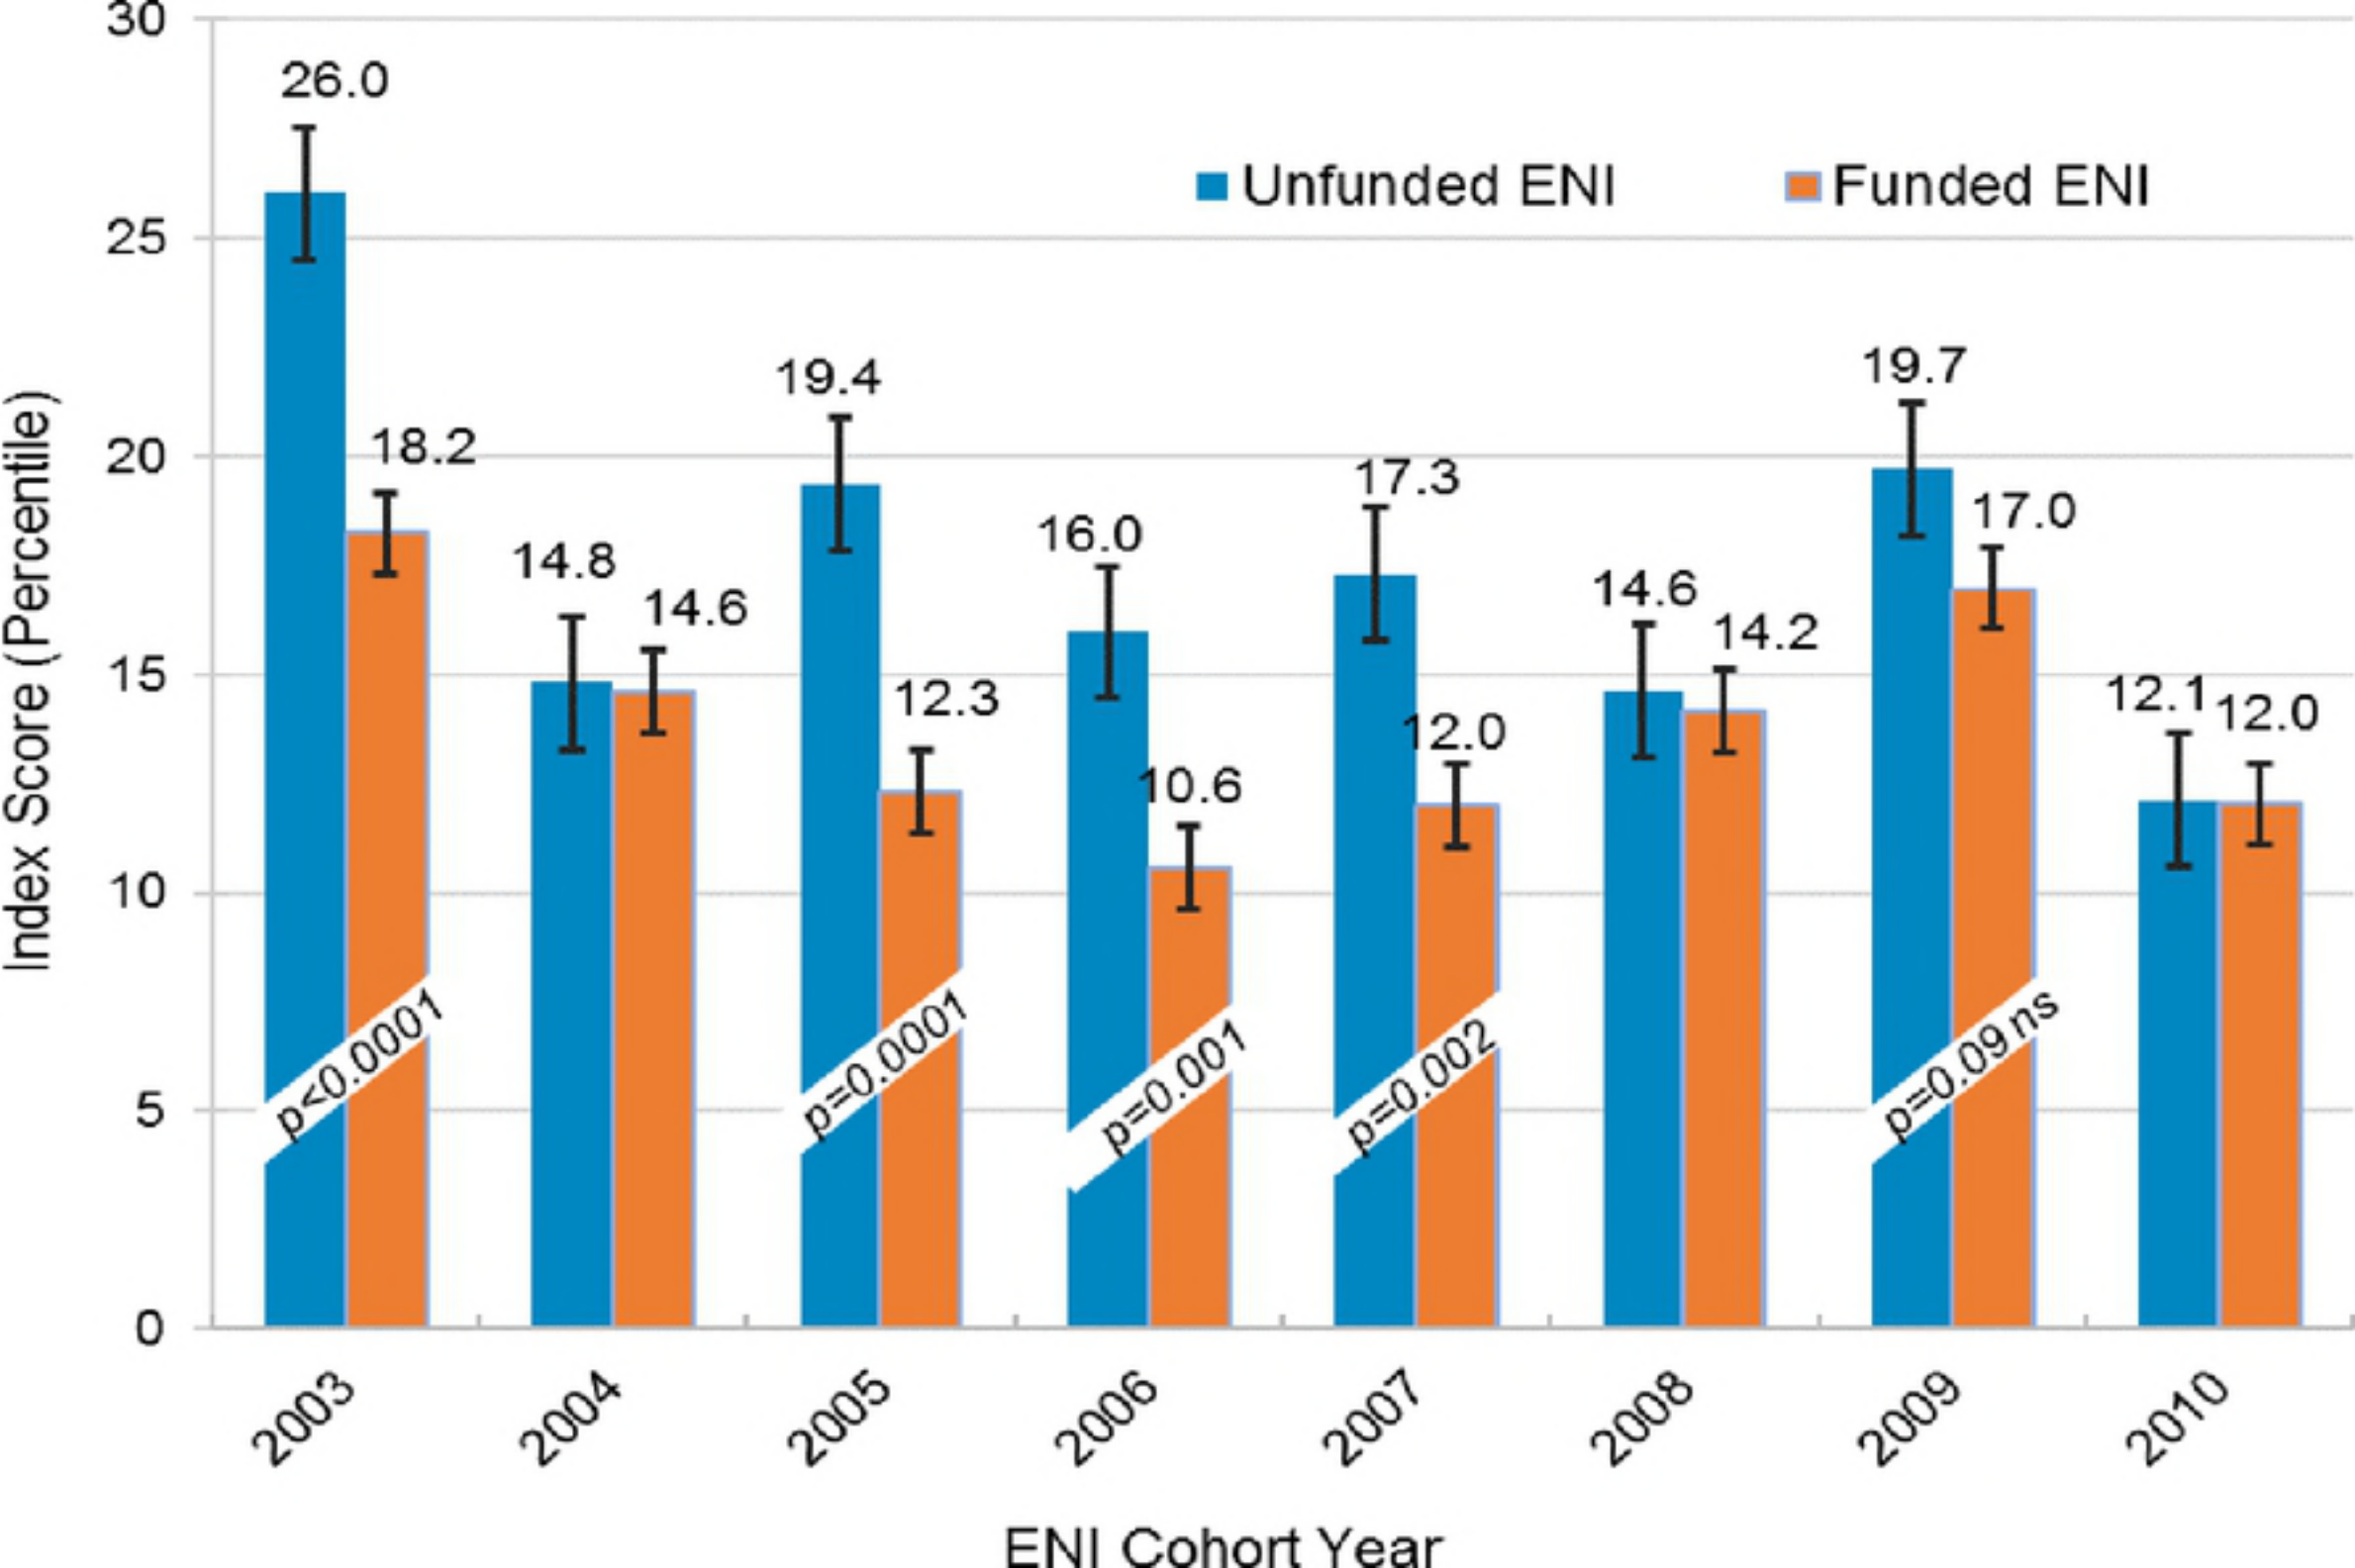

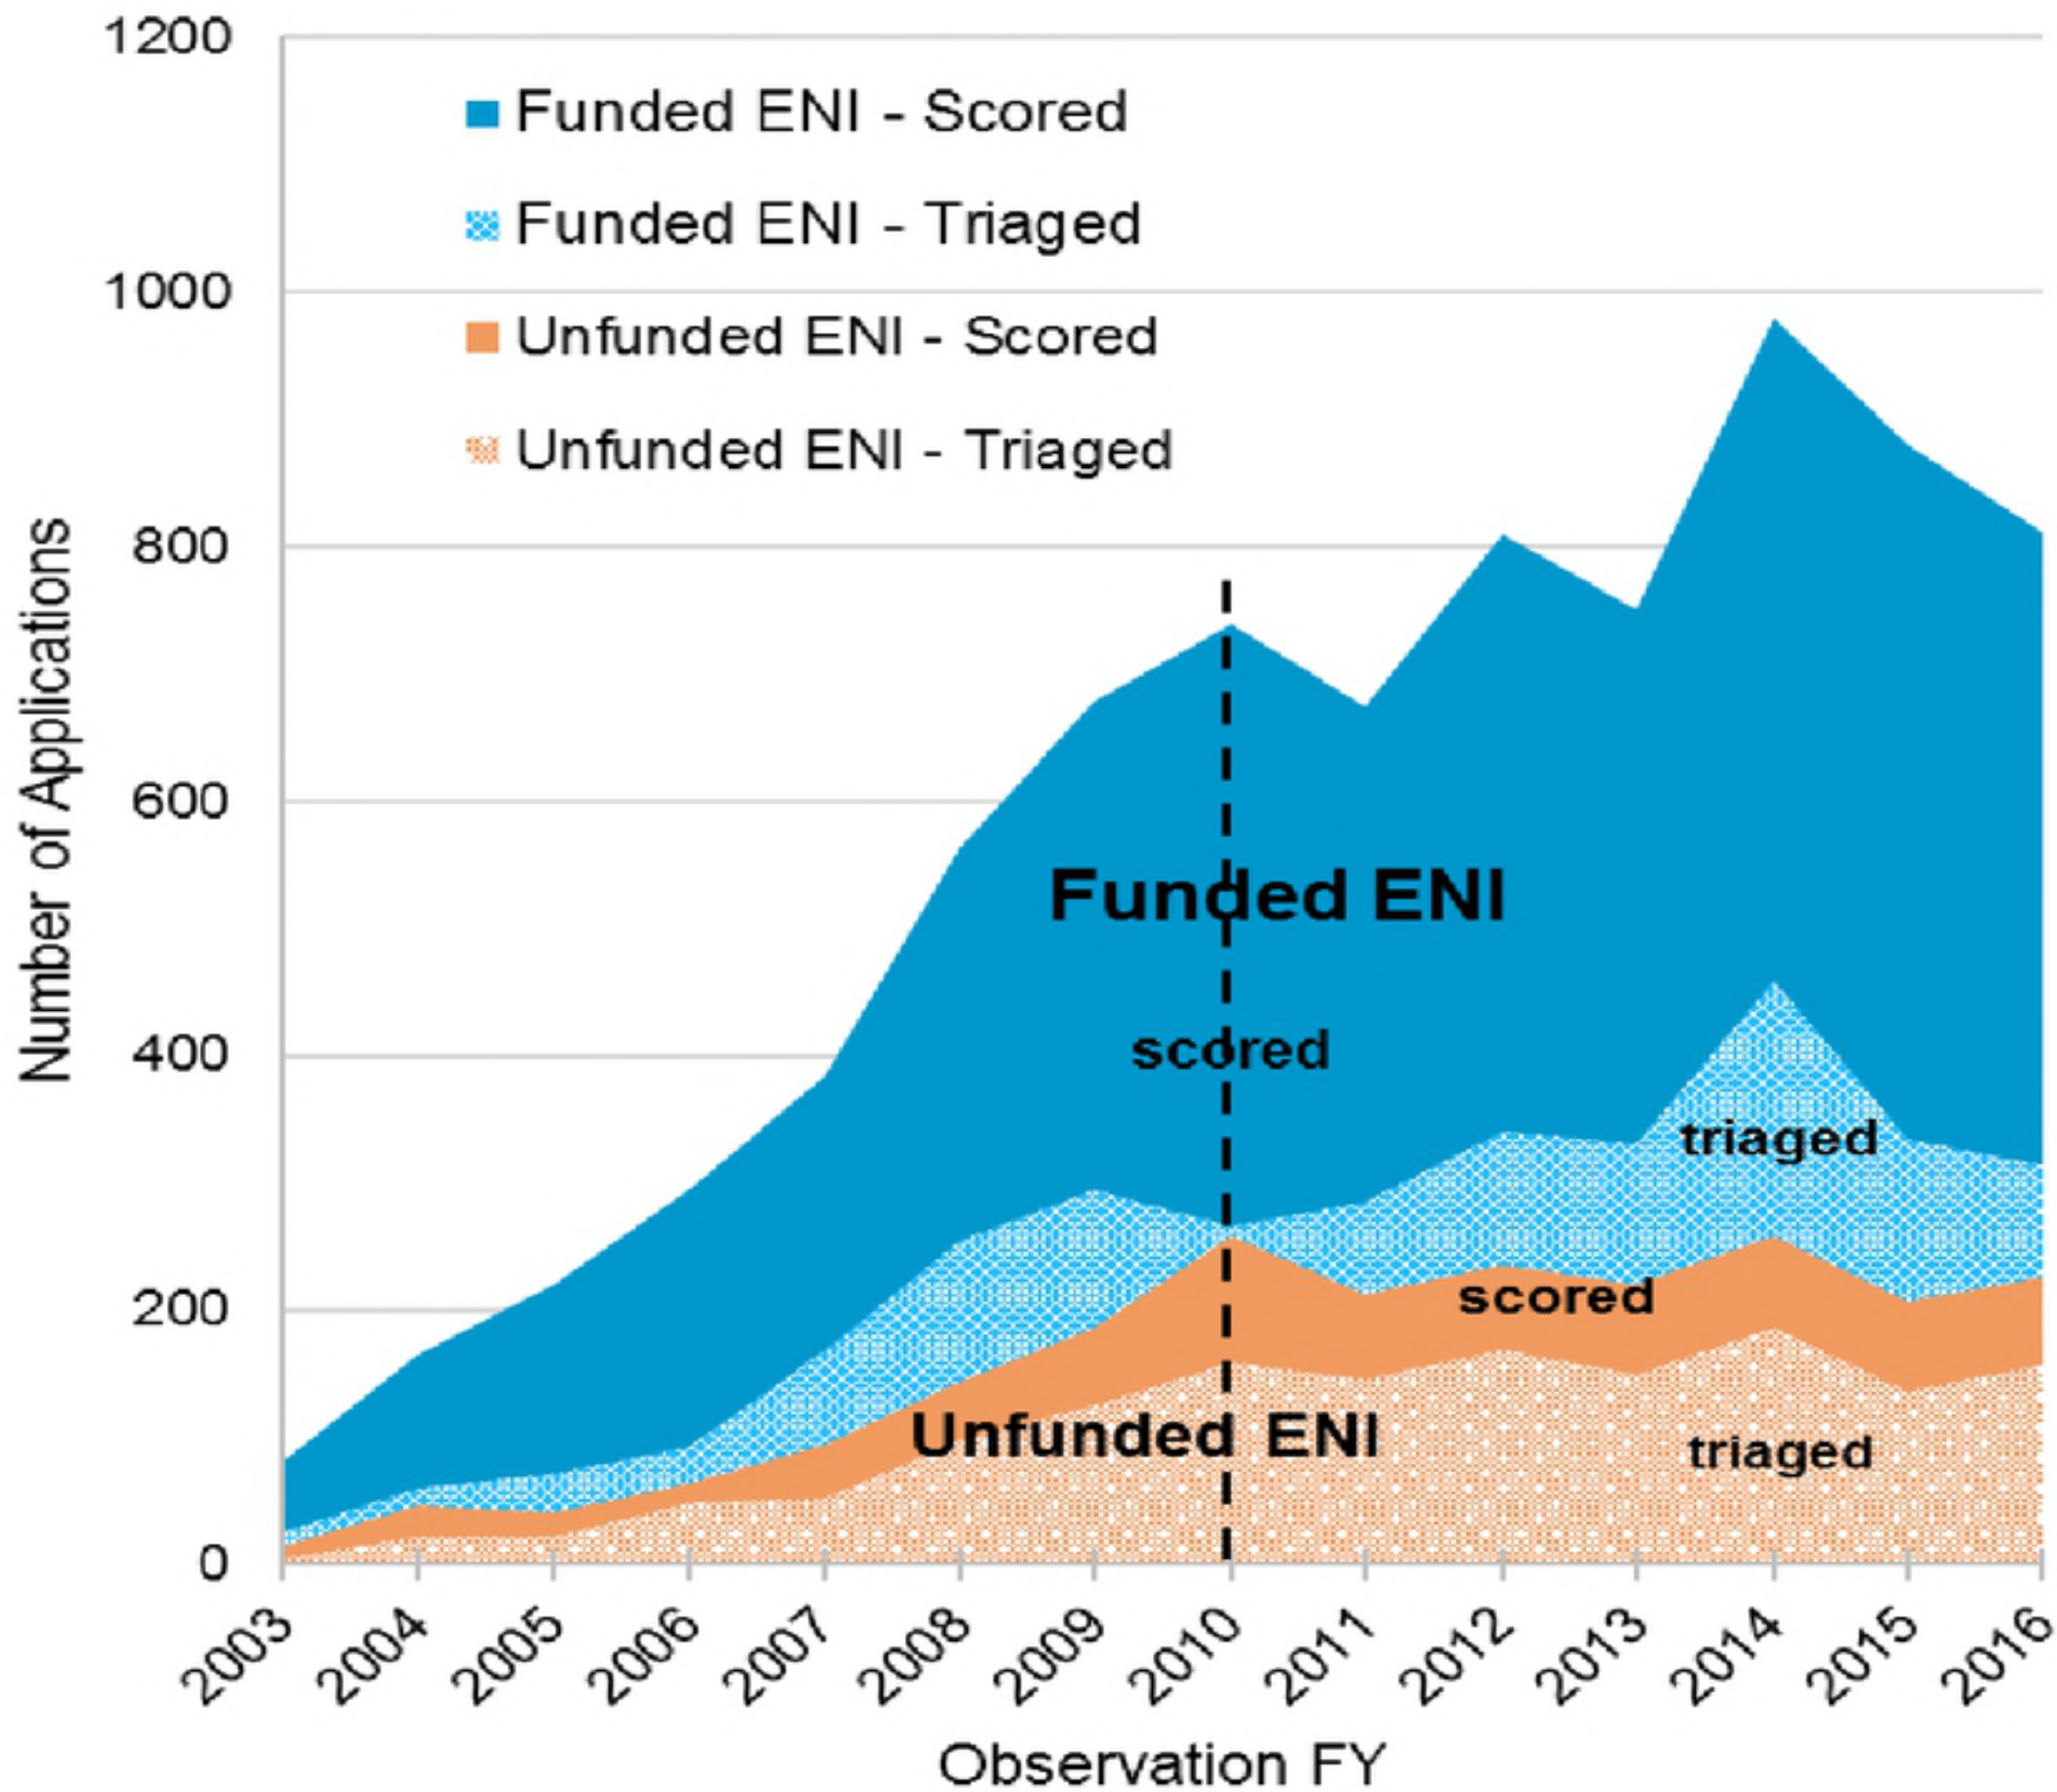

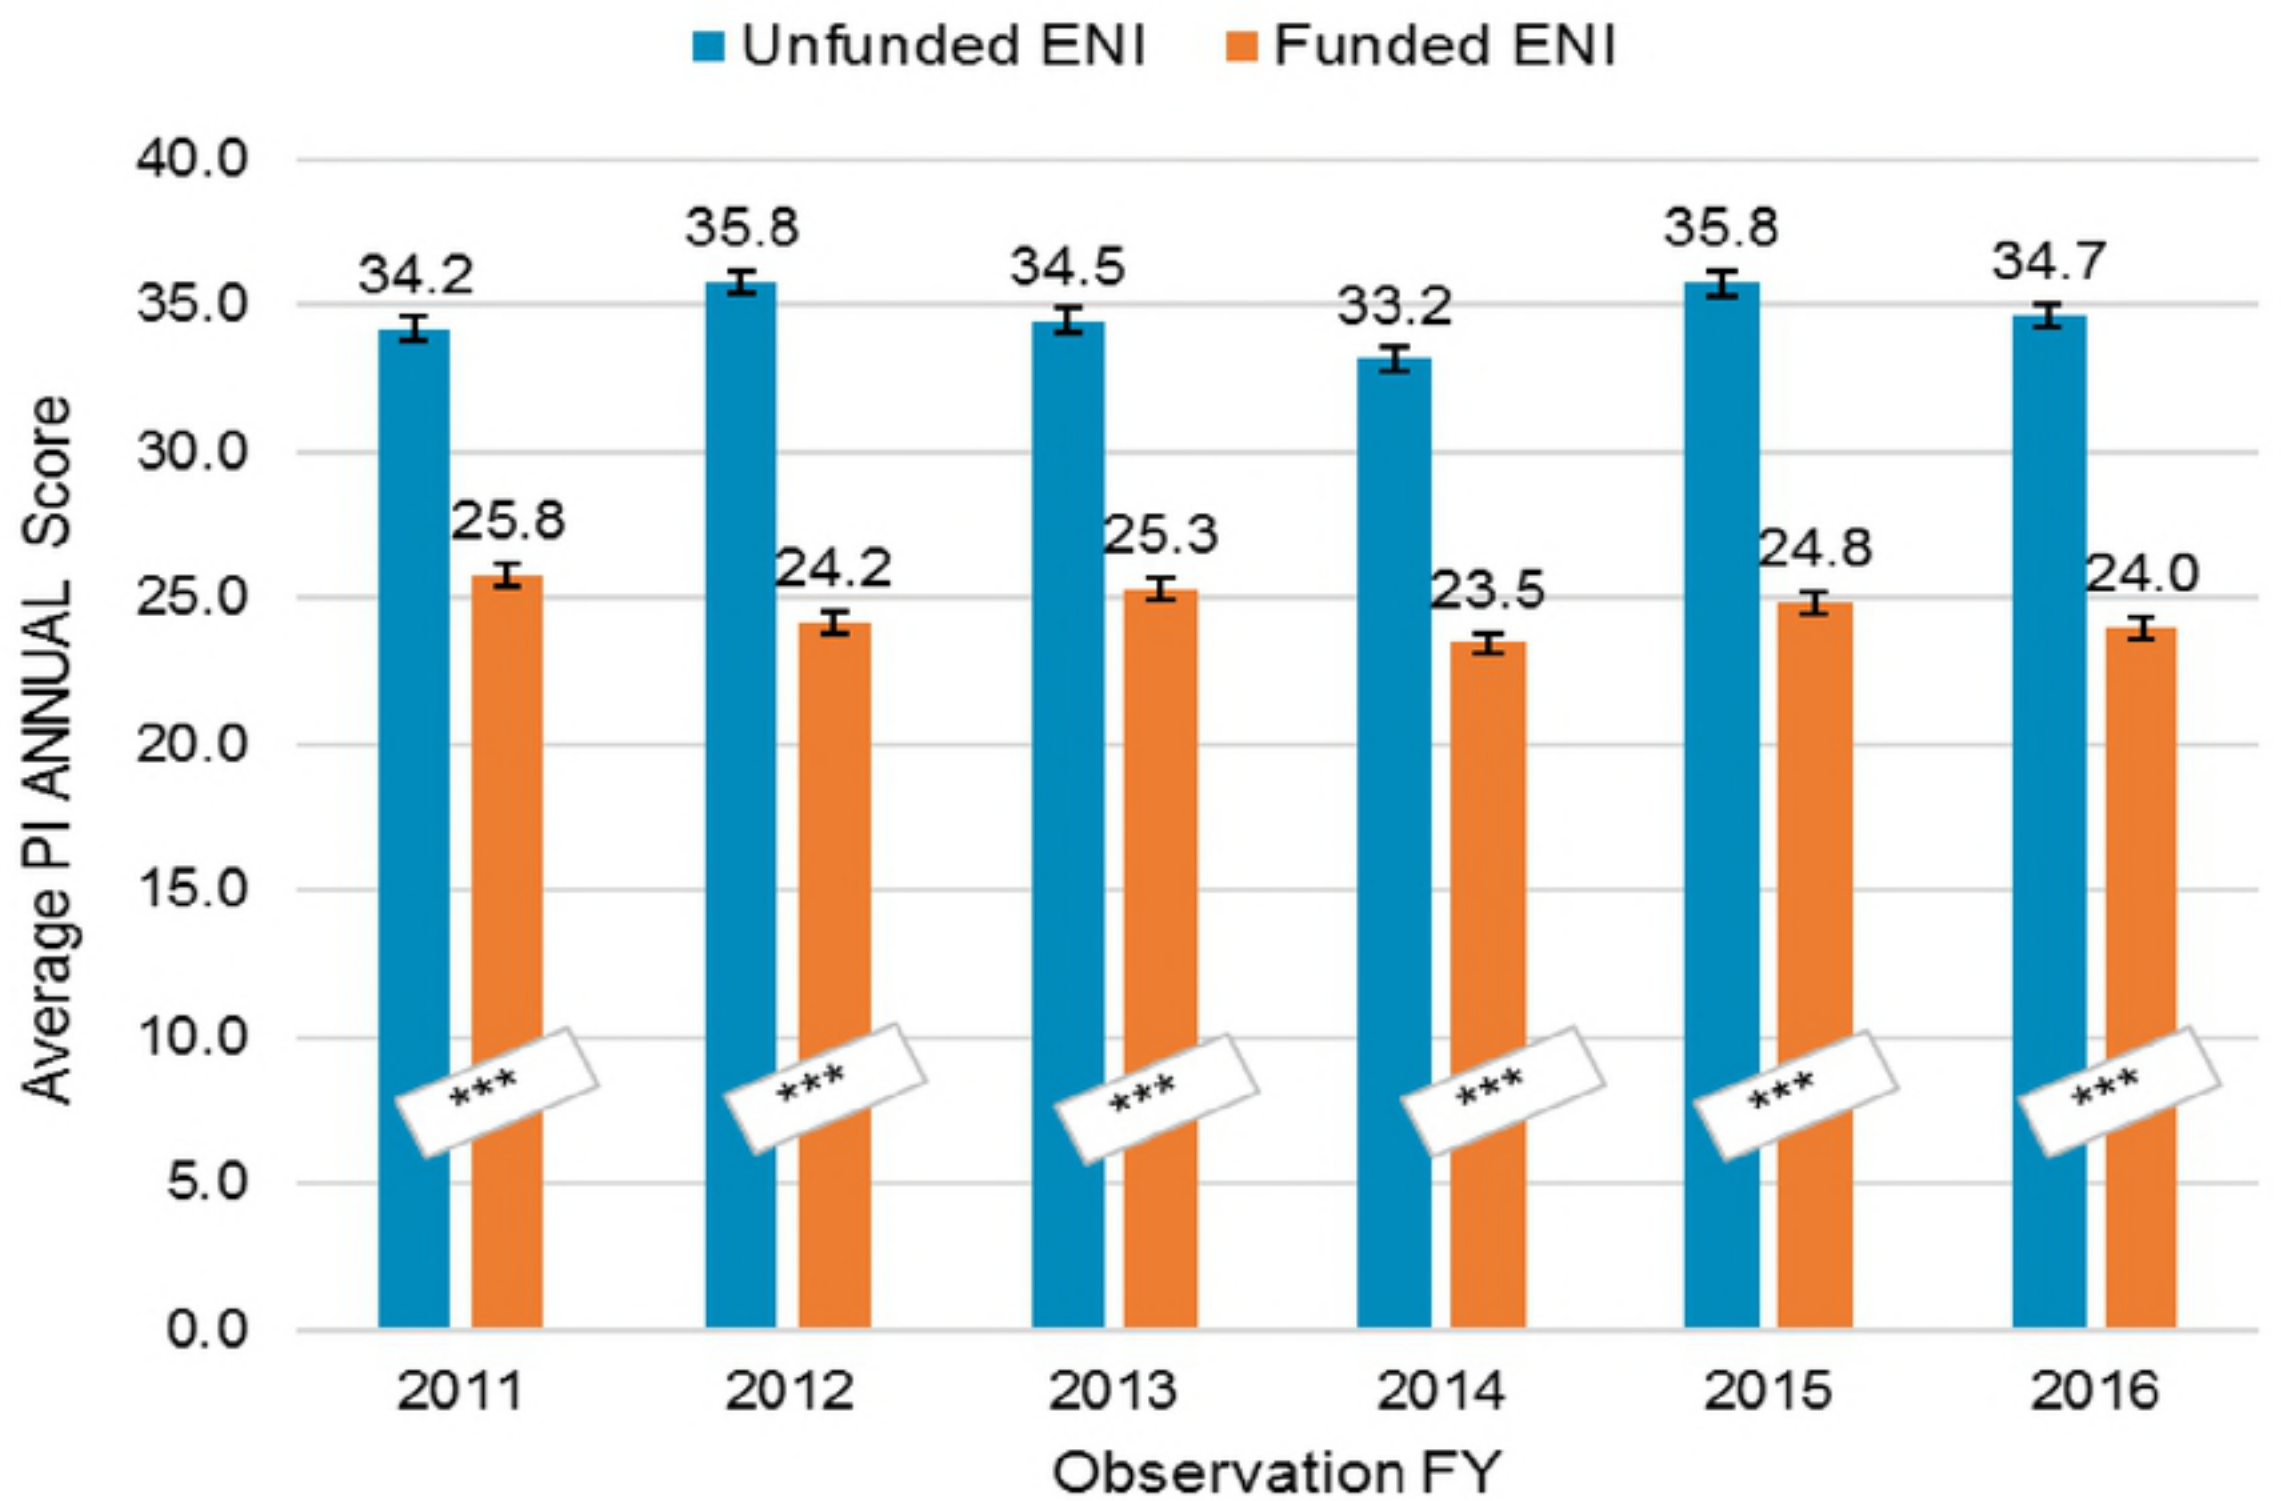

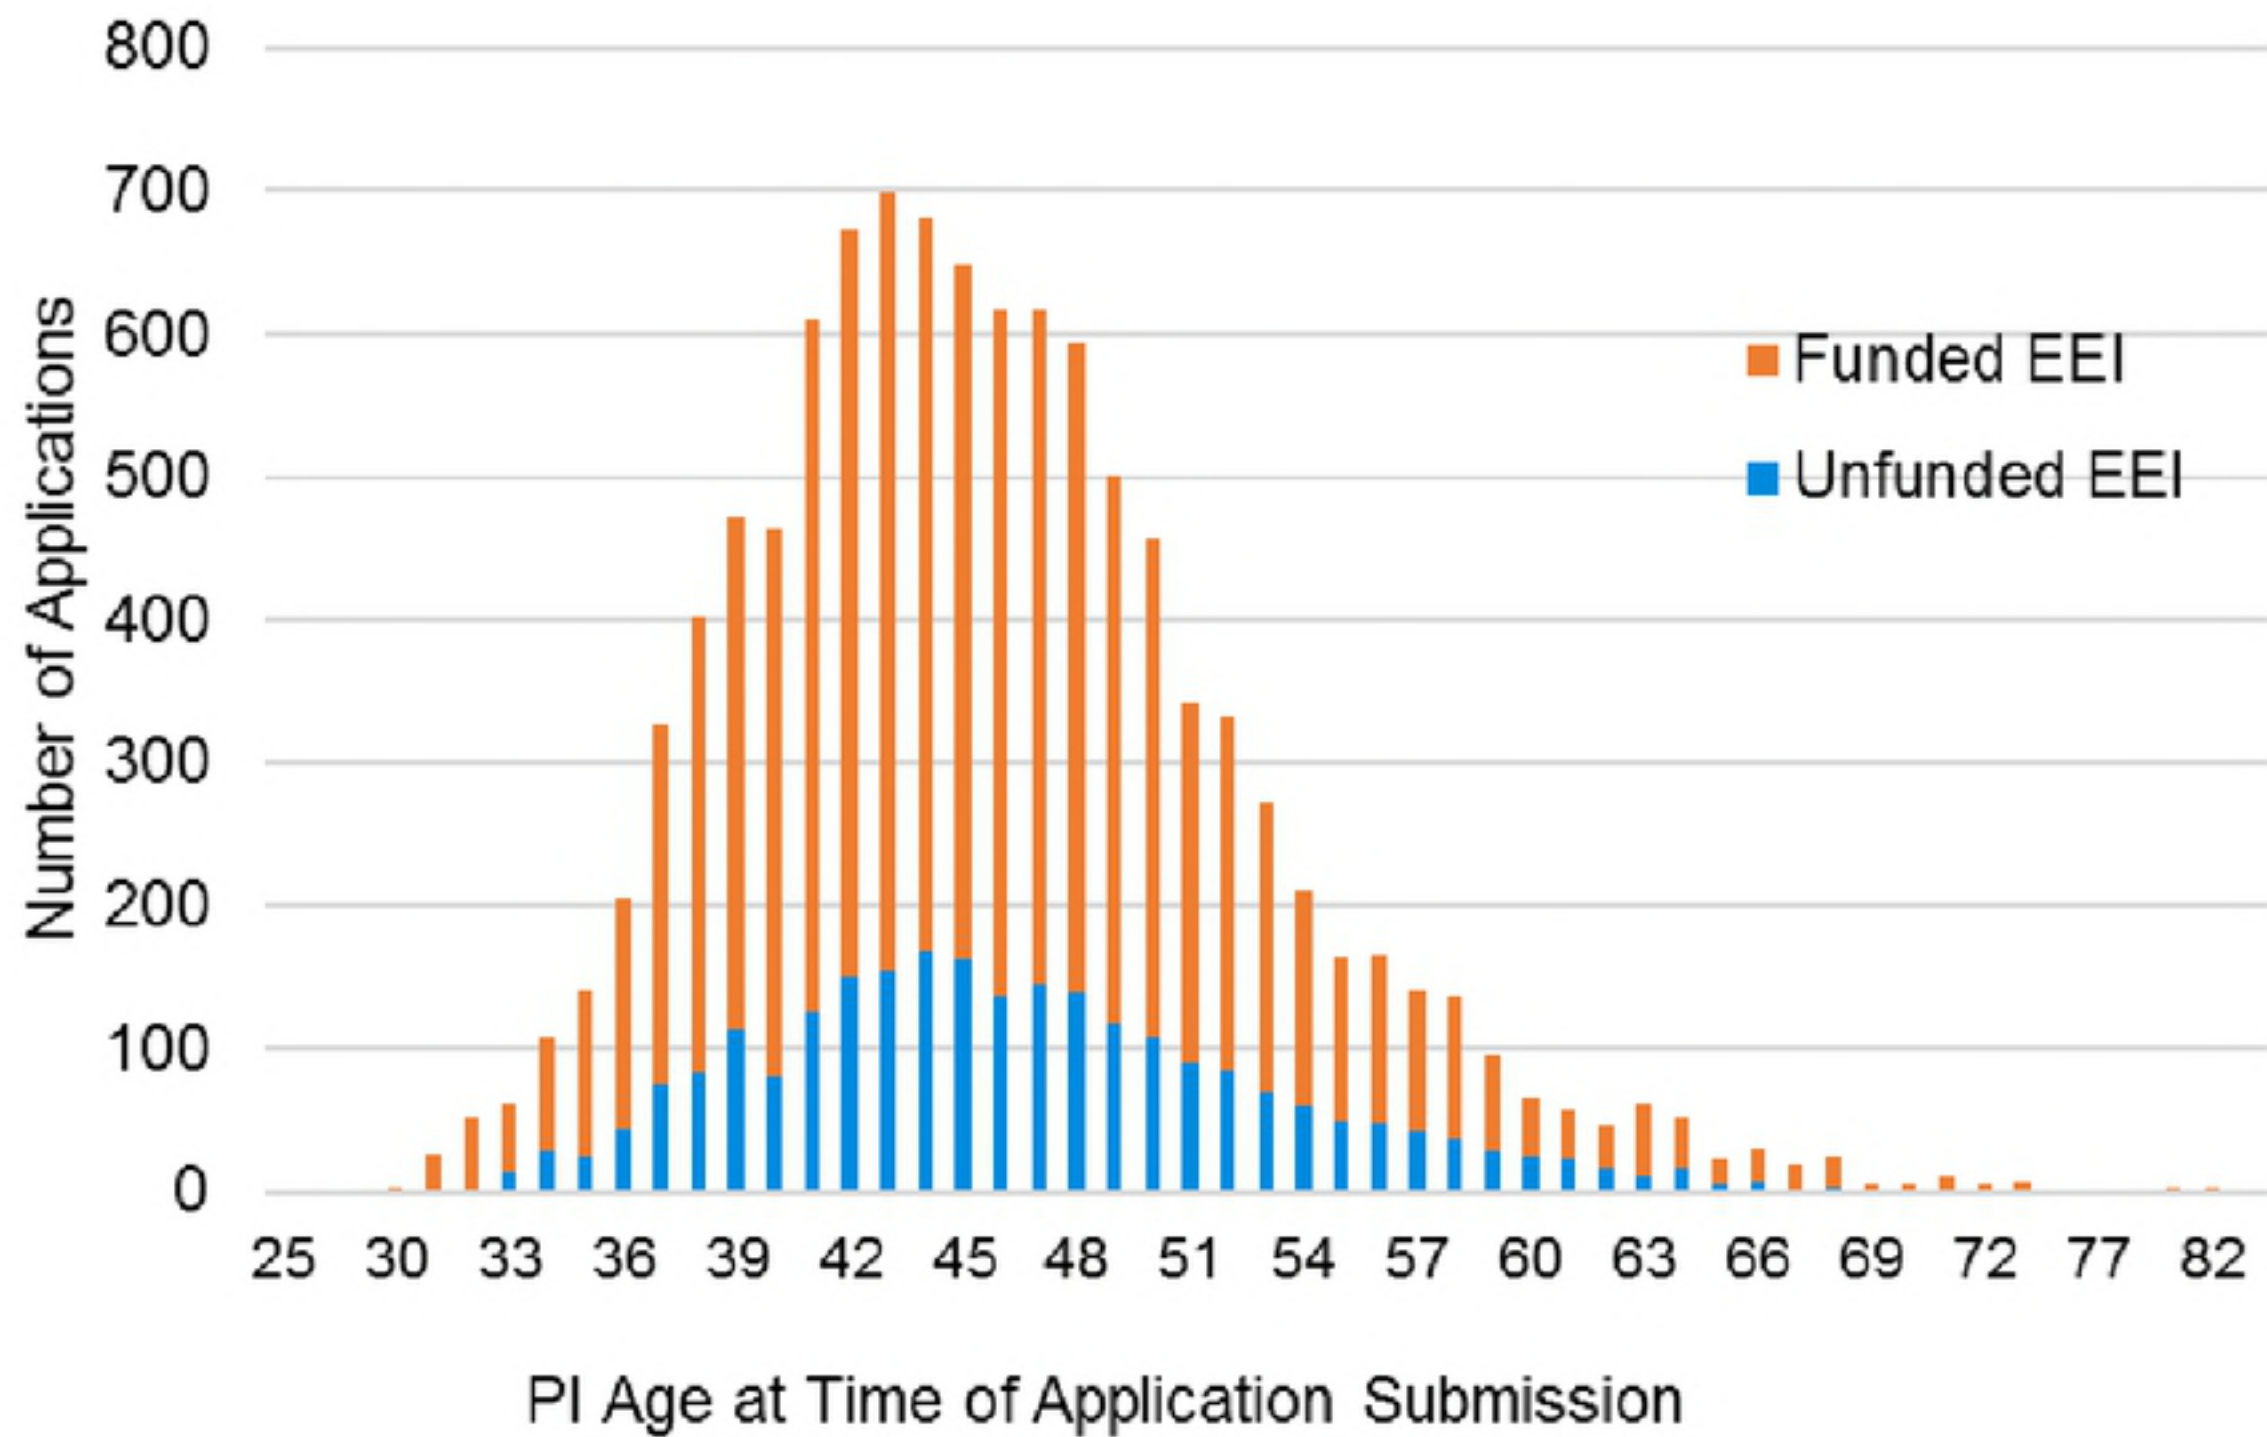

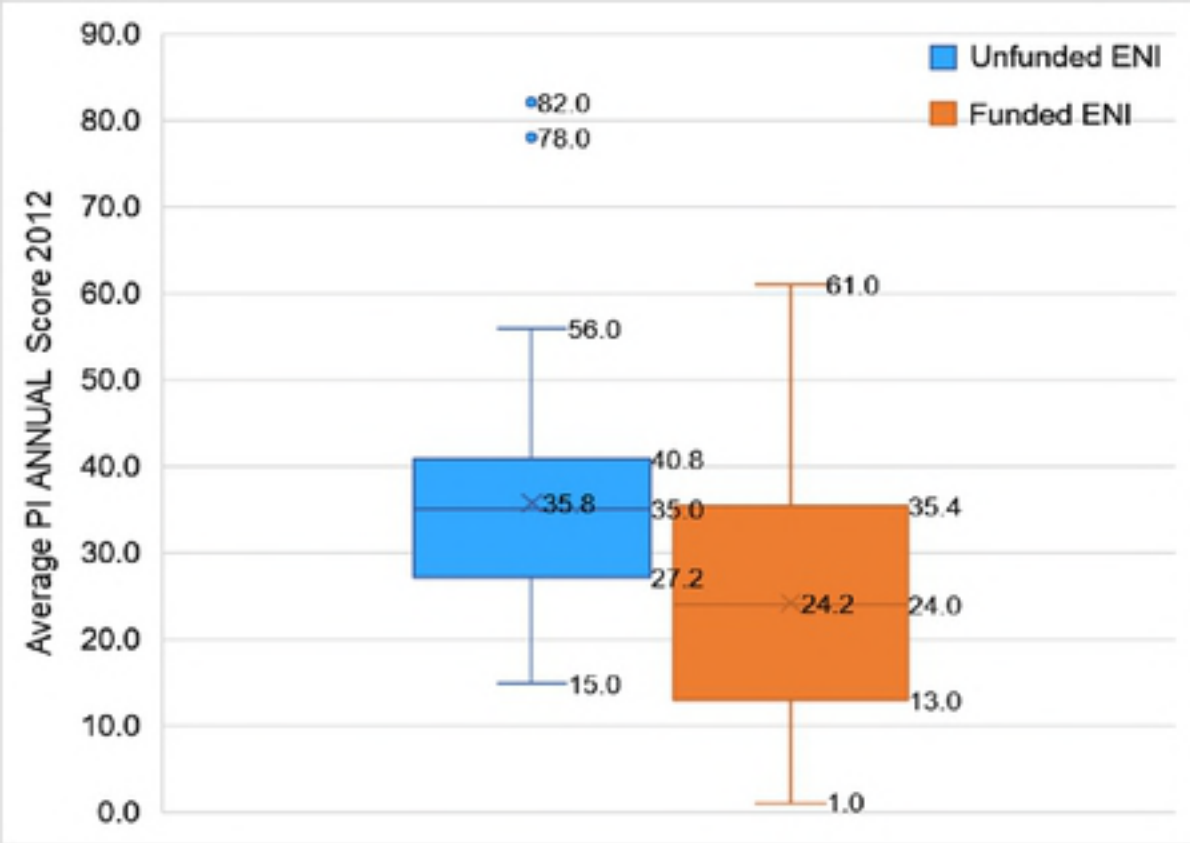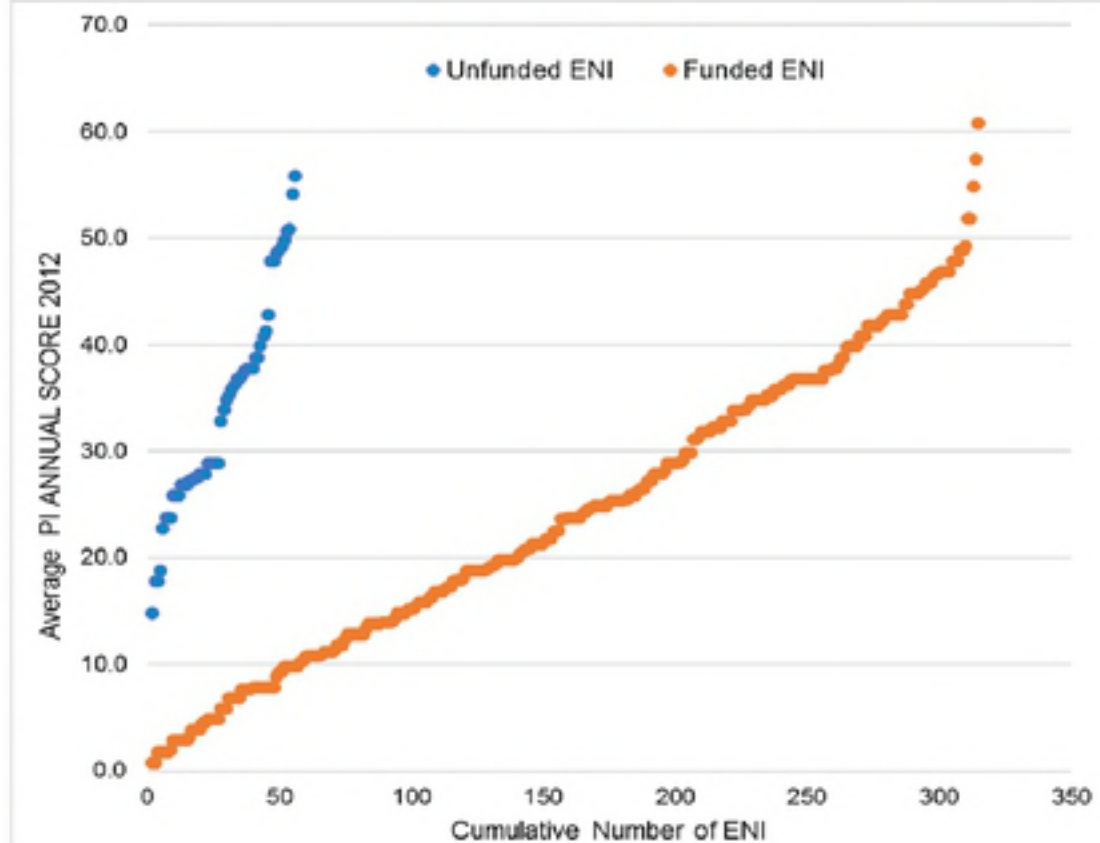

Source: http://biorxiv.org/content/10.1101/346049v1.full.pdf
